# Supplementary material for: Selective oxidation of active site aromatic residues in engineered Cu proteins
Source: Royal Society of Chemistry journal article supplement (doi:10.1039/d4sc06667g), 2024-11-18
Supplement: d4sc06667g1.pdf [file d4sc06667g1.pdf]

## Supporting Information

### Selective Oxidation of Active Site Aromatic Residues in Engineered Cu Proteins

Kylie S. Uyeda, Alec H. Follmer\* and A. S. Borovik\*

Department of Chemistry, University of California–Irvine, Irvine, CA 92697-3900

\*Corresponding Authors: [afollmer@uci.edu](mailto:afollmer@uci.edu), [aborovik@uci.edu](mailto:aborovik@uci.edu)

#### Contents

|                                                                                                                                                                                                                         |            |
|-------------------------------------------------------------------------------------------------------------------------------------------------------------------------------------------------------------------------|------------|
| <b>Preparative methods</b>                                                                                                                                                                                              | <b>S1</b>  |
| <b>Physical methods</b>                                                                                                                                                                                                 | <b>S3</b>  |
| <b>Protein crystallography, X-ray diffraction data collection and processing</b>                                                                                                                                        | <b>S5</b>  |
| <b>Liquid chromatography mass spectrometry methods</b>                                                                                                                                                                  | <b>S7</b>  |
| <b>Scheme S1.</b> Preparation of [Cu <sup>II</sup> (biot-et-dpa)] cofactor                                                                                                                                              | <b>S11</b> |
| <b>Scheme S2.</b> Assay for LPMO-like reactivity                                                                                                                                                                        | <b>S11</b> |
| <b>Figure S1.</b> Molecular models of Cu-Sav proteins used in this study                                                                                                                                                | <b>S12</b> |
| <b>Figure S2.</b> HABA titrations                                                                                                                                                                                       | <b>S13</b> |
| <b>Figure S3.</b> UV-vis Cu-2xm-S112Y + H <sub>2</sub> O <sub>2</sub>                                                                                                                                                   | <b>S14</b> |
| <b>Figure S4.</b> EPR Cu-2xm-S112Y + H <sub>2</sub> O <sub>2</sub>                                                                                                                                                      | <b>S15</b> |
| <b>Figure S5.</b> Molecular models of Cu-2xm compared to Cu-2xm-S112Y                                                                                                                                                   | <b>S16</b> |
| <b>Figure S6.</b> Atom labeling for indicated bond lengths listed in Table S7                                                                                                                                           | <b>S17</b> |
| <b>Figure S7.</b> Molecular model of Cu-2xm-S112Y + H <sub>2</sub> O <sub>2</sub> with $F_o-F_c$ map                                                                                                                    | <b>S18</b> |
| <b>Figure S8.</b> Molecular model of Cu-2xm-S112Y + H <sub>2</sub> O <sub>2</sub> with two Y112 conformations                                                                                                           | <b>S19</b> |
| <b>Figure S9.</b> Chromatograms of intact Cu-Sav variants                                                                                                                                                               | <b>S20</b> |
| <b>Figure S10.</b> Mass spectra showing ions of highest abundance of intact Cu-Sav variants                                                                                                                             | <b>S21</b> |
| <b>Figure S11.</b> Chromatograms of intact apo- and biot- Sav variants                                                                                                                                                  | <b>S22</b> |
| <b>Figure S12.</b> Mass spectra showing ions of highest abundance of intact apo- and biot- Sav variants                                                                                                                 | <b>S23</b> |
| <b>Figure S13.</b> Deconvoluted mass spectra of intact apo- and biot- Sav variants                                                                                                                                      | <b>S24</b> |
| <b>Figure S14.</b> Integrated areas of chromatograms for biot-Sav variants                                                                                                                                              | <b>S25</b> |
| <b>Figure S15.</b> Mass spectra of DF31 for biot-Sav variants                                                                                                                                                           | <b>S26</b> |
| <b>Figure S16.</b> Chromatogram, ions of highest abundance and deconvoluted mass spectrum of intact Cu-2xm-S112Y Sav + <sup>18</sup> O <sub>2</sub> H <sub>2</sub>                                                      | <b>S27</b> |
| <b>Figure S17.</b> Identified <i>b/y</i> ion fragments for Cu-2xm-S112Y ± H <sub>2</sub> O <sub>2</sub>                                                                                                                 | <b>S28</b> |
| <b>Figure S18.</b> Chromatograms of digested Cu-Sav variants                                                                                                                                                            | <b>S29</b> |
| <b>Figure S19.</b> Separately integrated chromatographic peaks containing DF31 and resulting mass spectra                                                                                                               | <b>S30</b> |
| <b>Figure S20.</b> Integrated areas of chromatograms for Cu-Sav variants                                                                                                                                                | <b>S31</b> |
| <b>Figure S21.</b> Molecular model of Cu-2xm-S112Y with distances from Cu to other residues in DF31 susceptible to oxidation                                                                                            | <b>S32</b> |
| <b>Figure S22.</b> Molecular model of Cu-2xm-S112Y + H <sub>2</sub> O <sub>2</sub> (other residues in DF31 known to be susceptible to oxidation by H <sub>2</sub> O <sub>2</sub> with $F_o-F_c$ difference density map) | <b>S33</b> |
| <b>Figure S23.</b> Molecular model of Cu-2xm-S112A-K121Y-Sav                                                                                                                                                            | <b>S34</b> |
| <b>Figure S24.</b> Molecular model of Cu-2xm-S112F-Sav                                                                                                                                                                  | <b>S35</b> |
| <b>Figure S25.</b> Molecular models of Cu-2xm-S112Y compared to Cu-2xm-S112F                                                                                                                                            | <b>S36</b> |

|                                                                                      |            |
|--------------------------------------------------------------------------------------|------------|
| <b>Figure S26.</b> Chromatogram, and ion of highest abundance for Cu-2xm-S112F       | <b>S37</b> |
| <b>Figure S27.</b> Chromatogram and integrated area of chromatogram for Cu-2xm-S112F | <b>S38</b> |
| <b>Figure S28.</b> Reactivity with PNPg                                              | <b>S39</b> |
| <b>Table S1.</b> EPR simulation parameters of spectra in Figure S3                   | <b>S40</b> |
| <b>Table S2.</b> X-ray crystallography data processing and refinement statistics     | <b>S41</b> |
| <b>Table S3.</b> Select bond lengths and angles according to labelling in Figure S5  | <b>S42</b> |
| <b>Table S4.</b> Intact protein LC-MS gradient method                                | <b>S43</b> |
| <b>Table S5.</b> Peptide LC-MS gradient method                                       | <b>S43</b> |
| <b>Table S6.</b> Possible digest fragments of 2xm-S112Y-Sav                          | <b>S44</b> |
| <b>Table S7.</b> Calculated $m/z$ values for $b/y$ ion fragments of DF31             | <b>S45</b> |
| <b>References</b>                                                                    | <b>S46</b> |

## Preparative Methods

All commercially available reagents were purchased of the highest purity and used as received. Acetonitrile, ethanol, and diethyl ether were degassed with argon and dried by vacuum filtration through activated alumina according to the procedure outlined by Grubbs.<sup>1</sup> Nanopure water was obtained from Millipore Super-Q Plus water purification system, 120 V, 4-stage purification system with pump. Thin-layer chromatography (TLC) was performed on Whatman 250  $\mu$ m layer 6 Å aluminum-backed silica plates and visualized using ultraviolet (UV) light. Silica gel chromatography was performed using Fisher reagent silica gel 60 (230-400 mesh) with indicated solvents. Biotin pentafluorophenol ester (biot-PFP)<sup>2</sup> and di-(2-picolyl)amine (dpa)<sup>3</sup> were prepared according to literature procedures.

<sup>1</sup>H and <sup>19</sup>F nuclear magnetic resonance (NMR) spectra were recorded at 500 and 400 MHz respectively. <sup>1</sup>H NMR spectra are reported in ppm on the  $\delta$  scale and referenced to tetramethylsilane or solvent residual. The data are presented as follows: chemical shift, multiplicity (s=singlet, d=doublet, t=triplet, q=quartet, quin=quintet, m=multiplet, br=broad), and integration.

*Preparation of Cu cofactor.* The ligand (biot-et-dpa) was prepared as published previously.<sup>4</sup> <sup>1</sup>H (500 MHz, DMSO-d<sub>6</sub>)  $\delta$  8.48 (d, 2H), 7.76 (td, 3H), 7.53 (d, 2H) 7.25 (t, 2H), 6.40 (s, 1H), 6.33 (s, 1H), 4.29 (t, 1H), 4.12 (t, 1H), 3.78 (s, 4H), 3.20 (q, 2H), 3.08 (q, 1 H), 2.81 (dd, 1 H), 2.59 (s, 1H), 2.56 (t, 2H), 2.04 (t, 2H), 1.47 (m, 6H).

The Cu-complex [Cu<sup>II</sup>(biot-et-dpa)(NO<sub>3</sub>)<sub>2</sub>] was prepared by addition of a solution of Cu(NO<sub>3</sub>)<sub>2</sub>•3H<sub>2</sub>O (85.2 mg, 0.353 mmol) in 10 mL ethanol to a solution of biot-et-dpa (150.2 mg, 0.324 mmol) in 50 mL ethanol. The pale blue solution was allowed to stir for 4 hours before concentrating

the solution to ~1 mL followed by precipitation with diethyl ether (**Scheme S1**). Blue solid was collected via filtration, washed with diethyl ether and dried under vacuum.

HR-MS (ES, MeOH)  $m/z$  calcd for  $C_{26}H_{32}CuN_8O_8S [M - (NO_3)]^+$  621.2, found 621.4.

*Preparation of Sav variants.* The construction of E101Q-K121A-S112Y-Sav (denoted 2xm-S112Y-Sav), E101Q-S112A-K121Y-Sav (denoted 2xm-K121Y-Sav) and E101Q-K121A-S112F-Sav (denoted 2xm-S112F-Sav), was achieved by site-directed mutagenesis (SDM) using the codon optimized E101Q-K121A-pET24a-Sav plasmid, the following primers, and Phusion polymerase.<sup>5</sup>

S<sub>112</sub>Y\_fwd: 5'-CTGACCTATGGCACCACCGAAGCAAATC-3'

S<sub>112</sub>Y\_rev: 5'-GGTGCCATAGGTCAGCAGCCACTGGGTC-3'

S<sub>112</sub>A\_fwd: 5'-CTGACCGCAGGCACCACCGAAGCAAATC-3'

S<sub>112</sub>A\_rev: 5'-GGTGCCCTGCGGTCAGCAGCCACTGGGTC-3'

K<sub>121</sub>Y\_fwd: 5'-GCCTGGTATAGCACCCTGGTTGGTCATC-3'

K<sub>121</sub>Y\_rev: 5'-GGTGCTATAACCAGGCATTTGCTTCGGAC-3'

SDM reaction mixtures were transformed into *Escherichia coli* Rosetta or b121 cells followed by rescue with lysogeny broth (LB) media. The solution was spread aseptically onto LB/Kanamycin agar plates and incubated overnight at 37 °C. Single colonies were used to inoculate 10 mL liquid LB/Kanamycin cultures and incubated overnight at 37 °C with shaking at 200 rpm. Of the overnight cultures, 600 μL was saved to prepare glycerol stocks to be stored in 25% glycerol at -80 °C. From the remaining liquid culture, plasmids were isolated using Qiagen Miniprep kit according to manufacturer's instructions. DNA sequencing was performed by Genewiz. Glycerol stocks described above were used to inoculate overnight liquid cultures for expression of Sav mutants. Expression and purification of Sav variants was carried out as reported previously.<sup>6</sup>

## Physical Methods

*Instrumentation.* Electronic absorbance spectra were recorded with an Agilent Cary 50 or Cary 60 UV-vis spectrophotometer in a 1 cm quartz cuvette.

Electron paramagnetic resonance (EPR) spectra were recorded with a Bruker EMX Series EPR spectrometer equipped with an ER4102ST cavity and ER041XG microwave bridge.

*HABA titrations.* 4'-hydroxyazobenzene-2-carboxylic acid (HABA) is a dye that absorbs light at 506 nm when bound to streptavidin. To determine the average number of biotin binding groups per

protein molecule, a titration of Cu-complex into HABA-bound Sav was performed and displacement of HABA was monitored by the decrease in 506 nm absorbance. To a 1 cm quartz cuvette, 2.4 mL of 8  $\mu$ M Sav in 200 mM phosphate buffer pH 7 was added. Then 288  $\mu$ L of a 20 mM (150 equivalents relative to Sav monomer) HABA solution in 200 mM sodium phosphate buffer pH 7 was added and allowed to equilibrate for 5 minutes. A 1 mM aqueous solution of Cu complex was added in 9.6  $\mu$ L portions until 5 equivalents total were added. Each titration point was spectrophotometrically monitored by following the decrease in absorbance at  $\lambda_{\text{max}} = 506$  nm until no further changes in intensity were observed (**Figure S2**).

*General preparation of Cu-Sav in solution.* A solution of lyophilized Sav was prepared in nanopure water. This solution was diluted to 150  $\mu$ M in MES buffer (50 mM, pH 6), and five equivalents of Cu-complex (750  $\mu$ M) were added from 10 mM stock solution in nanopure water. Samples were separated from excess Cu complex and concentrated using Amicon Ultra 10K centrifugal filter devices and washed with 5X volume of nanopure water or buffer. The concentration of Cu-Sav stock solution was determined based on  $\epsilon_{\text{M}} = 167,760$  at  $\lambda_{\text{max}} = 280$  nm and diluted to the final working concentration as specifically indicated for each experiment described below.

*Electronic absorbance spectroscopy.* Cu-Sav was diluted to a final concentration of 150  $\mu$ M (600  $\mu$ M Cu) in 50 mM 2-(N-morpholino)ethanesulfonic acid (MES) buffer pH 6 in a low-volume 1 cm quartz cuvette. For  $[\text{Cu}^{\text{II}}(\text{biot-et-dpa})\text{C}2\text{XM-S112Y-Sav}]$  (**1**), a feature at  $\lambda_{\text{max}} = 15675$   $\text{cm}^{-1}$  (638 nm) was observed, attributed to a Cu d-d transition. This feature was slightly red-shifted in the analogous ArM lacking the tyrosine mutation ( $[\text{Cu}^{\text{II}}(\text{biot-et-dpa})\text{C}2\text{XM-S112Y-Sav}]$ , **2**), with  $\lambda_{\text{max}} = 15480$   $\text{cm}^{-1}$  (646 nm), indicating a change in the ligand environment of the Cu center. For  $[\text{Cu}^{\text{II}}(\text{biot-et-dpa})\text{C}2\text{XM-K121Y-Sav}]$  (**3**), with a tyrosine mutation in a different location, the Cu d-d transition was observed at  $\lambda_{\text{max}} = 15723$   $\text{cm}^{-1}$  (636 nm).

Upon addition of 10 equivalents of hydrogen peroxide ( $\text{H}_2\text{O}_2$ ) relative to the Cu concentration to **1**, spectra were collected every 10 minutes (**Figure S3**). Over the first 90 minutes, we observe a hypsochromic shift in the Cu d-d transition as well as the growth of a new shoulder at  $\sim 405$  nm. The shift in energy of the Cu d-d transition after addition of  $\text{H}_2\text{O}_2$  over this time suggests a conformational change surrounding the Cu center, which could be important for reactivity. The observation of the

growth of the shoulder at ~405 nm is intriguing as it reminiscent of our previous work suggesting the potential formation of a Cu<sup>II</sup>-hydroperoxido species.<sup>7</sup>

*Electron paramagnetic resonance (EPR) spectroscopy.* Cu-Sav was diluted to a final concentration of 250  $\mu$ M (1 mM Cu) in 50 mM MES buffer pH 6. The solution was allowed to equilibrate for 5 min before addition of 10 equivalents H<sub>2</sub>O<sub>2</sub> relative to the Cu concentration. Aliquots of 250  $\mu$ L were transferred to an EPR tube and flash-frozen in liquid nitrogen. EPR spectra were collected at 77 K, 2.1 mW, 9.4 GHz and averaged over 10 scans (**Figure S4** and **Table S1**). We did not observe changes in the EPR spectra of **1** upon addition of H<sub>2</sub>O<sub>2</sub> to suggest formation of a new Cu<sup>II</sup>-OOH species.

*Reactivity with PNPG.* To assess reactivity with an external substrate, a previously reported assay for LPMO-like activity was used.<sup>8</sup> Generally, the assay is carried out at pH 10-11 in the presence of 200 equivalents each of *p*-nitrophenyl- $\beta$ -D-glucopyranoside (PNPG) substrate and H<sub>2</sub>O<sub>2</sub> (**Scheme S2**). Cu-Sav was diluted to a final concentration of 100  $\mu$ M in sodium carbonate buffer (50 mM, pH 10.5). To this solution, 200 equivalents (final concentration 20 mM) PNPG were added and allowed to equilibrate for 5 min. Then 200 equivalents of H<sub>2</sub>O<sub>2</sub> (final concentration 20 mM) were added and production of 4-nitrophenolate was monitored by UV-vis at  $\lambda_{\text{max}} = 405$  nm. (**Figure S28**).

### **Protein Crystallization, X-ray Diffraction Data Collection and Processing**

*Crystallization of Cu-Sav.* Apo-Sav protein was crystallized by the sitting drop vapor diffusion method. Diffraction-quality crystals were grown at ambient temperature and pressure by mixing 2.5  $\mu$ L protein solution (30 mg/mL for 2xm-S112Y-Sav or 26 mg/mL for 2xm-Sav, 2xm-K121Y-Sav or 2xm-S112F-Sav lyophilized protein in nanopure water) and 2.5  $\mu$ L crystallization buffer (2.0 M ammonium sulfate, 0.1 M sodium acetate, pH 4). The droplet was equilibrated against a reservoir of 100  $\mu$ L crystallization buffer solution. Single crystals of Cu-Sav were prepared by soaking apo-Sav crystals soaking buffer (3.0 M ammonium sulfate, 0.1 M sodium acetate, pH 6) for 10 min, followed by a solution of 9  $\mu$ L soaking buffer mixed with 1  $\mu$ L of Cu-complex (10 mM Cu-complex, 100 mM CuCl<sub>2</sub> in nanopure water) overnight. Upon soaking Sav crystals with Cu-complex, crystals turned from colorless to blue. After soaking in Cu-complex, the blue-colored crystals were transferred to soaking buffer for 10 min to remove excess Cu-complex and Cu salts, then to a solution of 9  $\mu$ L soaking buffer

mixed with 1  $\mu\text{L}$   $\text{H}_2\text{O}_2$  (10 mM) for 5–10 min. Crystals were cryoprotected in Paratone oil (Hampton Research) and shock frozen in liquid nitrogen.

*X-ray diffraction data collection and processing.* X-ray diffraction data were collected at the Advanced Light Source (BL 5.0.3, 5.0.2 and 5.0.1) or the Stanford Synchrotron Radiation Lightsource (SSRL, BL 12-1 or 12-2). Diffraction images were integrated with iMosflm<sup>9</sup> (**1**, **2**, **3**, **1**+ $\text{H}_2\text{O}_2$ ) or XDS<sup>10</sup> (**4**) and scaled with AIMLESS (ccp4 Suite).<sup>11</sup> For molecular replacement, Phaser-MR (PHENIX Suite)<sup>12</sup> was used with PDB: 2QCB with water molecules removed as the input model.

Structural refinement was carried out in PHENIX.REFINE<sup>12,13</sup> and COOT.<sup>14</sup> Restraints for biot-et-dpa (ligand ID: QG7) were created using eLBOW (PHENIX Suite). For water and solvent picking, electron density, and structure visualization, the software COOT<sup>14</sup> was used. Figures were drawn with PyMOL (Schrodinger, LLC Version 2.5.2) Crystallographic details, processing, and refinement statistics are given in **Table S2**.

*Overall structures.* Apo-crystals of Sav soaked with Cu-complex constituted space group I4<sub>1</sub>22 with unit cell parameters reported in **Table S2**. One Sav monomer was obtained per asymmetric unit after molecular replacement. Protein residues 2–11 and 135–159 of the N- and C- termini, respectively, were not resolved in electron density, presumably due to disorder.

*General Cu-complex modelling.* For all structures of apo-Sav crystals soaked with Cu-complex the following general observations were made: i) residual electron density in the  $F_o-F_c$  map in the biotin-binding pocket, and ii) one (for **1**, **3** or **4**) or two (for **2**) peaks in an anomalous density map in the biotin vestibule superimposed with the electron density peak. The residual electron density was fit with the Cu-complex which projected Cu to the position of the strong anomalous density peak. In **1**, the occupancy of the Cu center was refined to 0.65, and 0.74 with  $\text{H}_2\text{O}_2$ . In **3**, the occupancy of the Cu center was refined to 0.63. In **4**, the occupancy of the Cu center was refined to 0.78. In **2**, the occupancy of the two copper centers were refined to 0.66 and 0.3. Due to overlap of two cofactor conformations and the uncertainty regarding the geometry of the second conformation coupled to its low occupancy, the deposited structure only contains the model of the major Cu-cofactor conformation (**Figure S5A**). In **1**, we also observed residual positive electron density in the  $F_o-F_c$  maps surrounding the Cu center. This density was fit to an acetate molecule coordinated to the Cu center in a  $\kappa^1$  fashion and a water molecule within H-bonding proximity to the acetate molecule. With  $\text{H}_2\text{O}_2$ , this site is occupied by a water molecule. Similarly, in **4**, the residual positive electron density in the  $F_o-F_c$  map was fit to an acetate molecule coordinated to the Cu center in a  $\kappa^1$  fashion.

*Modeling N49.* For structures of **2** and **3**, residue N49 is modeled as one rotamer. This rotamer is in the same conformation as in our previously reported structures of  $[\text{Cu}^{\text{II}}(\text{biot-et-dpea})\text{H}_2\text{O}]_2^{2+} \subset \text{WT-Sav}$  or  $[\text{Fe}^{\text{III}}(\text{biot-et-dpa})(\text{OH})_2(\kappa^1\text{-O}_{\text{E112}})] \subset \text{2xm-S112E-Sav}$ , where the amide likely participates in H-bonding with R84.<sup>4,7</sup> For all structures of **1**, we first modeled N49 in this conformation, but observed negative difference density in the  $F_o-F_c$  map surrounding the modelled amide as well as nearby residual positive difference density in the  $F_o-F_c$  map suggesting a second conformation of N49. The occupancy of this second N49 conformation was refined to 0.61, consistent with the refined Cu occupancy (0.65). The distance from the Cu center to the heteroatom is 2.4 Å. Due to the inability of the X-ray diffraction experiments to unambiguously determine N vs O coordination, we modeled this as a  $\text{Cu}-\kappa^1\text{-O}_{\text{N49}}$  based on the Cu-heteroatom bond distance as well as previously published reports of the  $\text{Cu}_\text{D}$  site in pMMO<sup>15</sup> and stellacyanin<sup>16</sup> active site structures. With  $\text{H}_2\text{O}_2$  addition, the occupancy drops to 0.51, about two-thirds of the refined Cu occupancy (0.74). Similarly in **4**, N49 was modeled in two conformations, where the occupancy of the bound conformation was refined to 0.58. Of all Cu-Sav variants reported by our group to date, **1** and **4** with F or Y introduced at position 112 are the only ArMs that exhibits N49 in this second conformation, and the N49 coordination is disrupted to some extent by  $\text{H}_2\text{O}_2$  addition.

*Modeling S112Y.* The first 90 degrees in phi rotation for further processing to mitigate possible effects of radiation damage. In this case, the positive density in the  $F_o-F_c$  map surrounding S112Y is only observed in **1** with  $\text{H}_2\text{O}_2$  addition (**Figure S7**). This was best modeled as S112Y covalently modified at the *meta* position. Given the proximity and orientation to the backbone carbonyl of A121 suggesting H-bonding interactions (shown in black dashed lines in **Figure 2**), the oxidized Y112 may be a catechol or semiquinone species. However, we also modeled S112Y in two rotamer positions of equal occupancies with no meaningful change in crystallographic refinement statistics (**Figure S8** and **Table S3**). The deposited structure represents a model of the oxidized Y112 corroborated by the LC-MS and trypsin digestion experiments described below.

*Adventitious Cu binding.* In **2**, we observe two additional peaks in the anomalous difference map 2.64 Å from  $\text{N}\eta_{\text{H87}}$  and 1.9 Å from  $\text{N}\eta_{\text{H127}}$  which were modeled as Cu atoms. The occupancies were refined to 0.94 and 0.20, respectively. In **3**, we observe one additional peak in the anomalous difference map 2.47 Å from  $\text{N}\eta_{\text{H87}}$  which was modeled and refined as a Cu atom with 0.71 occupancy.

## Liquid Chromatography/Mass Spectrometry (LC/MS) Methods

*Instrumentation.* Mass spectra of synthesized small-molecule intermediates were measured with an ACQUITY UPLC H-class system, single quadrupole QDa (Waters Corporation) or orthogonal acceleration time-of-flight (oa-TOF) LCT Premier (Waters Corporation). Mass spectra of intact proteins or peptides were measured with an ACQUITY ultra-performance liquid chromatography (UPLC) H-class system, Xevo G2-XS quadrupole time-of-flight (QTOF) (Waters Corporation).

*Sample preparation for mass spectral studies.* Cu-Sav was diluted to a final concentration of 150  $\mu\text{M}$  in 50 mM MES buffer pH 6. Hydrogen peroxide (100 mM) was added to final concentration of 6 mM (10 equivalents relative to Cu-complex). Samples were allowed to incubate with  $\text{H}_2\text{O}_2$  for 1 hour at room temperature.

Intact Cu-Sav was separated from remaining  $\text{H}_2\text{O}_2$  and buffer salts in reaction mixtures using Amicon Ultra 10K centrifugal filter devices and washed with 3X volume of nanopure water. The resulting Cu-Sav solution was boiled at 100  $^\circ\text{C}$  for 15 min to dissociate Cu-complex. Intact apo-Sav was separated from dissociated Cu-complex using Amicon Ultra 10K centrifugal filter devices and washed with 3X volume of nanopure water. Samples were diluted in nanopure water for LCMS.

Isotope labeled  $\text{H}_2\text{O}_2$  ( $^{18}\text{O}_2\text{H}_2$ , 90% isotope labeled, 2-2.4% solution in DI water) was obtained from Icon Isotopes. Cu-2xm-S112Y-Sav prepared as described above, incubated with  $^{18}\text{O}_2\text{H}_2$  (6 mM, assuming 2% solution in water), and prepared for LCMS as described above.

*Analysis of protein modification.* Intact apo-Sav sample was analyzed by LC-MS. Proteins were separated away from reaction buffer salts using a phenyl guard column at 45  $^\circ\text{C}$  (ACQUITY UPLC BEH Phenyl VanGuard Pre-column, 130  $\text{\AA}$ , 1.7  $\mu\text{m}$ , 2.1 x 5 mm, Waters Corporation). The 5 min LC method used flow rate of 0.2 mL/min of a gradient of 0.1% formic acid in water (Buffer A), and acetonitrile (Buffer B) according to gradient in **Table S4**.

The Xevo Z-spray ionization source was operated in positive MS resolution mode, 500–4000 Da, with a capillary voltage of 3000 V and cone voltage of 40 V (NaCsI calibration, Leu-enkephalin lock-mass). Nitrogen was used as the desolvation gas at 350  $^\circ\text{C}$  and total flow of 800 L/h. Retention times are given in minutes. The major peak of the chromatogram was selected for integration for further analysis (**Figures S9** and **S11**). Total average mass spectra were reconstructed from the charge state ion series using the MaxEnt1 algorithm from Waters MassLynx software V4.1 SCN949 according to



manufacturer's instructions.<sup>17</sup> The ions of highest abundance from this charge state ion series are shown in **Figures S10 and S12**.

*Enzymatic digestion and LC-MS/MS analysis.* Apo-Sav prepared as described above was subjected to solution digestion with trypsin gold (Promega) at 37 °C in ammonium acetate pH 7.8 for 8 hrs, following manufacturer's recommendations. All LC-MS/MS experiments were performed using the same Waters Xevo Q-TOF instrumentation and buffer system as the intact protein analysis listed above. Separation of peptides was performed by reverse-phase chromatography at 45 °C using a reverse-phase C4 column (ACQUITY UPLC Protein BEH C4 column, 300 Å, 1.7 µm, 2.1 x 50 mm, Waters Corporation) and the solvent gradient listed in **Table S5**. A 0.5 min waste-divert method was implemented to remove buffer salts.

The Xevo Z-spray source was operated with a capillary voltage of 3000 V and a cone voltage of 40 V (NaCsI calibration, Leu-enkephalin lock-mass). Nitrogen was used as the desolvation gas at 350 °C and a total flow of 800 L/h. Data was acquired across the 100–2000 Da range in MSe continuum mode with alternating 0.5 sec scans at alternating collision energy: low energy, 0 V, and a high collision energy ramp (15–45 V). The high energy data corresponds to the MS/MS secondary fragmentation of the low energies scans of a similar time.

The data was processed for exact mass peptide matching and b/y ion fragmentation confirmation using BioPharmaLynx software (Version 1.3.5, Waters Corporation). The software generates *in silico* peptide digestion data including all potential modifications and maps the real data with a 30-ppm error tolerance to the theoretically calculated masses. From **1**, BioPharmaLynx was used to identify the modified fragment of highest abundance compared to control incubated without H<sub>2</sub>O<sub>2</sub> addition. Of the 44 possible peptide fragments resulting from trypsin digestion, DF31 was identified as an oxidized fragment. From DF31, [DF31]<sup>3+</sup> and [DF31]<sup>2+</sup> were identified with theoretical  $m/z$  1080.6 and 1620.8, respectively, which elute at 3.07 min (**Table S6**). In samples of **1** treated with H<sub>2</sub>O<sub>2</sub>, we observe [DF31+16]<sup>3+</sup> with theoretical  $m/z$  1086.5, eluting at 2.87 min, and [DF31+32]<sup>3+</sup> with theoretical  $m/z$  1091.2, eluting at 2.97 min (**Figures S17–19**), supporting the single and double oxidation of DF31. The chromatogram was integrated over this entire range, from 2.85 to 3.12 min, to capture the relative abundance of both the unoxidized and oxidized DF31 species for further processing (**Figure 4**). The same areas of the chromatograms were integrated for further processing, to highlight the relative of DF31 and oxidized DF31 in each sample (**Figure S19**).

DF31 contains residues 104–132, supporting the notion that Y112 may be oxidized; however, this DF also contains other residues known to be susceptible to oxidation by H<sub>2</sub>O<sub>2</sub> (H127, W108, and

W120). MS/MS secondary fragmentation data were further analyzed for b/y ion fragment identification, and fragments b8, b7, [y20 +16]<sup>2+</sup>, [y21 +16]<sup>2+</sup>, and [y22 +16]<sup>2+</sup> were identified, confirming oxidation of residue Y112 (**Figure S17** and **Table S7**). This analysis of b/y ion fragmentation also indicates oxidation of W120 to some extent, and oxidation of H127 could not be ruled out.

Although we could not verify the specific oxidation of *only* Y112 in **1**, comparison to biot-2xm-S112Y-Sav (no copper) supports the idea that the Cu-cofactor enhances oxidation of DF31 upon addition of H<sub>2</sub>O<sub>2</sub>. In biot-2xm-S112Y-Sav, the oxidized fragments [DF31+16]<sup>3+</sup>, [DF31+32]<sup>3+</sup>, [DF31+16]<sup>2+</sup> and [DF31+32]<sup>2+</sup> could not be identified, suggesting that DF31 is not oxidized by H<sub>2</sub>O<sub>2</sub> in the absence of Cu. Unoxidized fragments [DF31]<sup>3+</sup> and [DF31]<sup>2+</sup> could be identified with theoretical  $m/z$  1080.6 and 1620.8, respectively, eluting at 3.1 min.

From **2**, [DF31]<sup>3+</sup> was identified with 1055.5  $m/z$ , which elutes at 3.1 min. After incubation with H<sub>2</sub>O<sub>2</sub>, a small amount of [DF31+16]<sup>3+</sup> and [DF31+32]<sup>3+</sup> was also observed, though their relative abundance compared to unoxidized species is significantly less than in the oxidized **1** variant (**Figure 4**). From **3**, [DF31]<sup>3+</sup> was identified with 1081.2  $m/z$ , which elutes at 3.06 min. The corresponding mass-shifted ions [DF31 + 16]<sup>3+</sup> and [DF31 + 16]<sup>2+</sup> were not observed in these samples treated with H<sub>2</sub>O<sub>2</sub>, suggesting that DF31 is not oxidized in **3** (**Figure 4**).

Similarly, in all biot-Sav variants studied, the corresponding mass-shifted ions [DF31 + 16]<sup>3+</sup> and [DF31 + 16]<sup>2+</sup> were not observed after treatment with H<sub>2</sub>O<sub>2</sub> (**Figures S14** and **S15**). It is interesting to note that overall oxidation of intact Sav is enhanced in all apo-Sav variants compared to biot-Sav variants, which is possibly due to ligand binding precluding access of H<sub>2</sub>O<sub>2</sub> to oxidizable residues (**Figure S13**).

Treatment of **1** with <sup>18</sup>O<sub>2</sub>H<sub>2</sub> resulted in the growth of two peaks in the mass spectrum at +17.5  $m/z$  and +35.1  $m/z$  corresponding to the incorporation of on one or two <sup>18</sup>O atoms into monomeric Sav derived from 90% isotope labeled <sup>18</sup>O<sub>2</sub>H<sub>2</sub>. (**Figure S16**). After trypsin digestion, [DF31]<sup>3+</sup>, [DF31+16]<sup>3+</sup> and [DF31+32]<sup>3+</sup> were identified; however, we could not deconvolve oxidized fragments containing <sup>18</sup>O versus <sup>16</sup>O.

Taken together, these data suggest that site-specific oxidation of secondary sphere amino acids is dependent on 1) the presence of the Cu cofactor, and 2) the proximity and orientation of the Cu center with respect to Tyr.

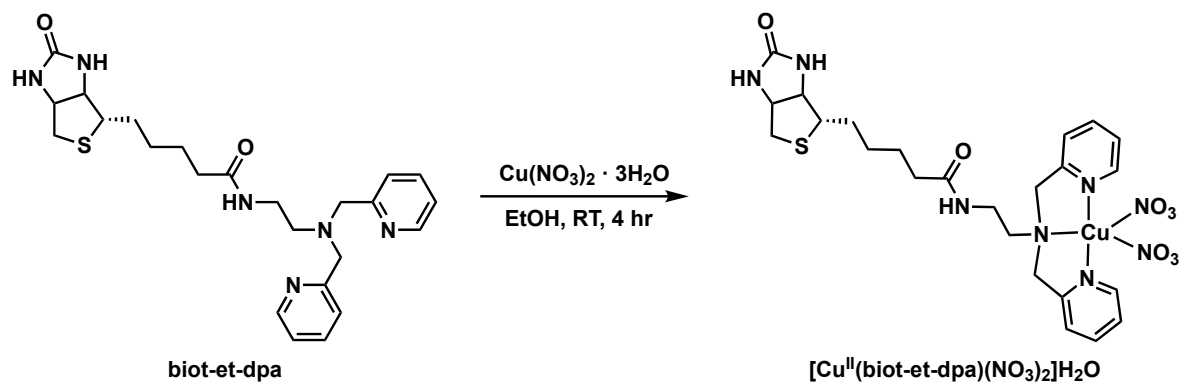

**Scheme S1.** Preparation of Cu cofactor

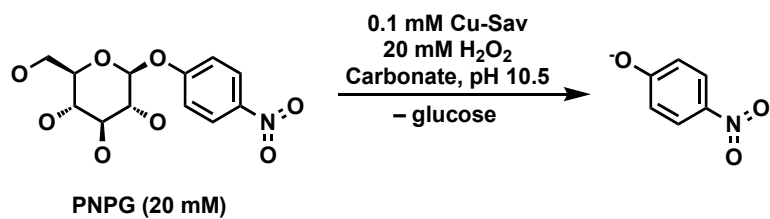

**Scheme S2.** Assay for LPMO-like reactivity with external substrate *p*-nitrophenyl- $\beta$ -D-glucopyranoside (PNPG) to produce 4-nitrophenolate (UV-vis  $\lambda_{\text{max}}=406 \text{ nm}$ )

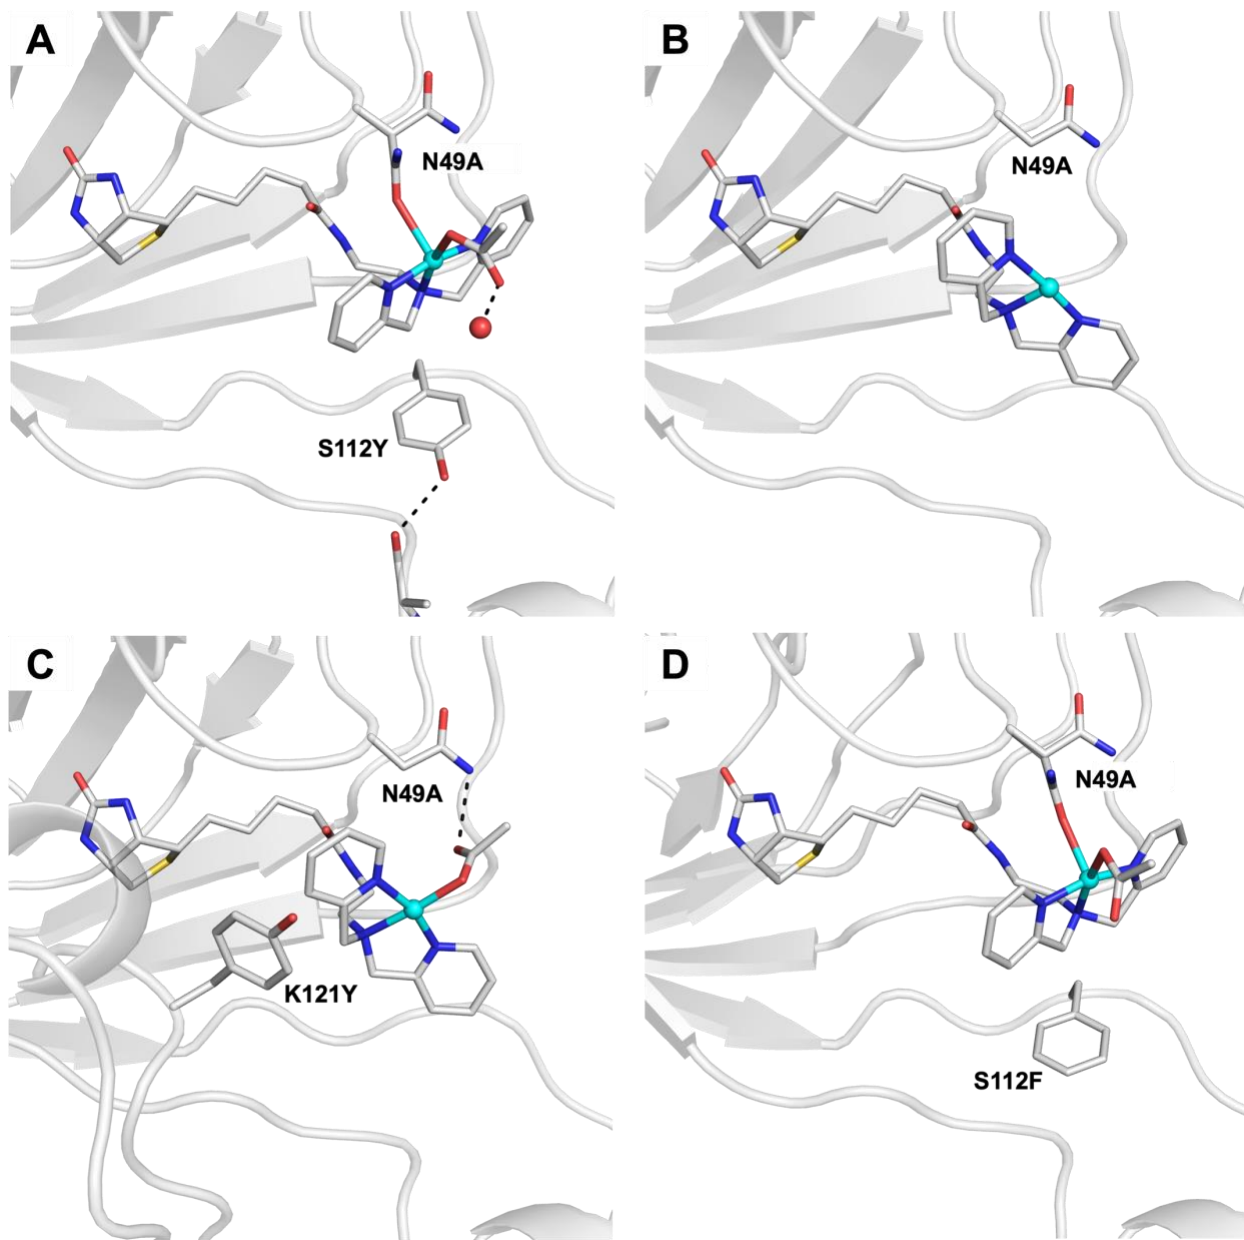

**Figure S1.** Molecular models of (A) 1 (PDB: 9CSU), (B) 2 (PDB: 9CST), (C) 3 (PDB: 9CSW), and (D) 4 (PDB: 9E6Z).

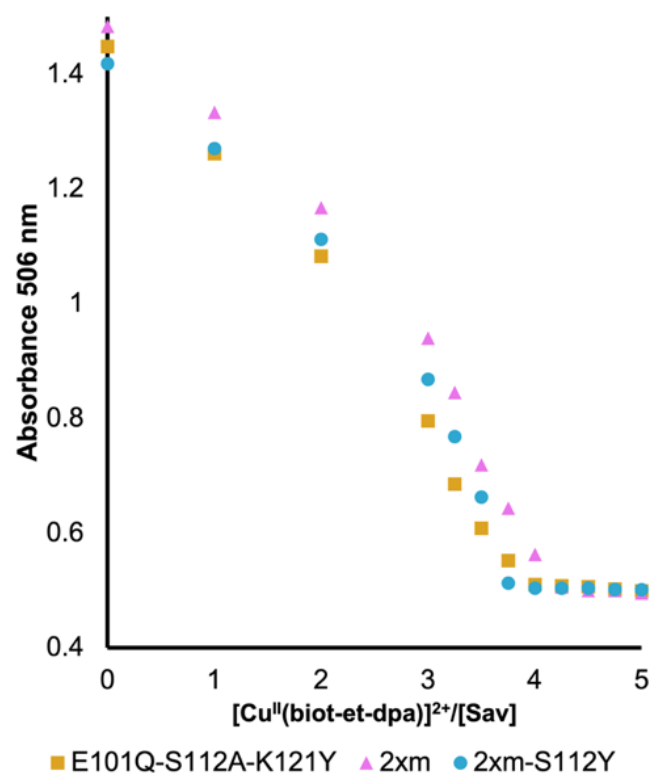

**Figure S2.** HABA titrations of Cu-et-dpa into Sav variants confirming an average of  $\sim 4$  biotin-binding sites per Sav molecule for each of the Sav variants used in this study.

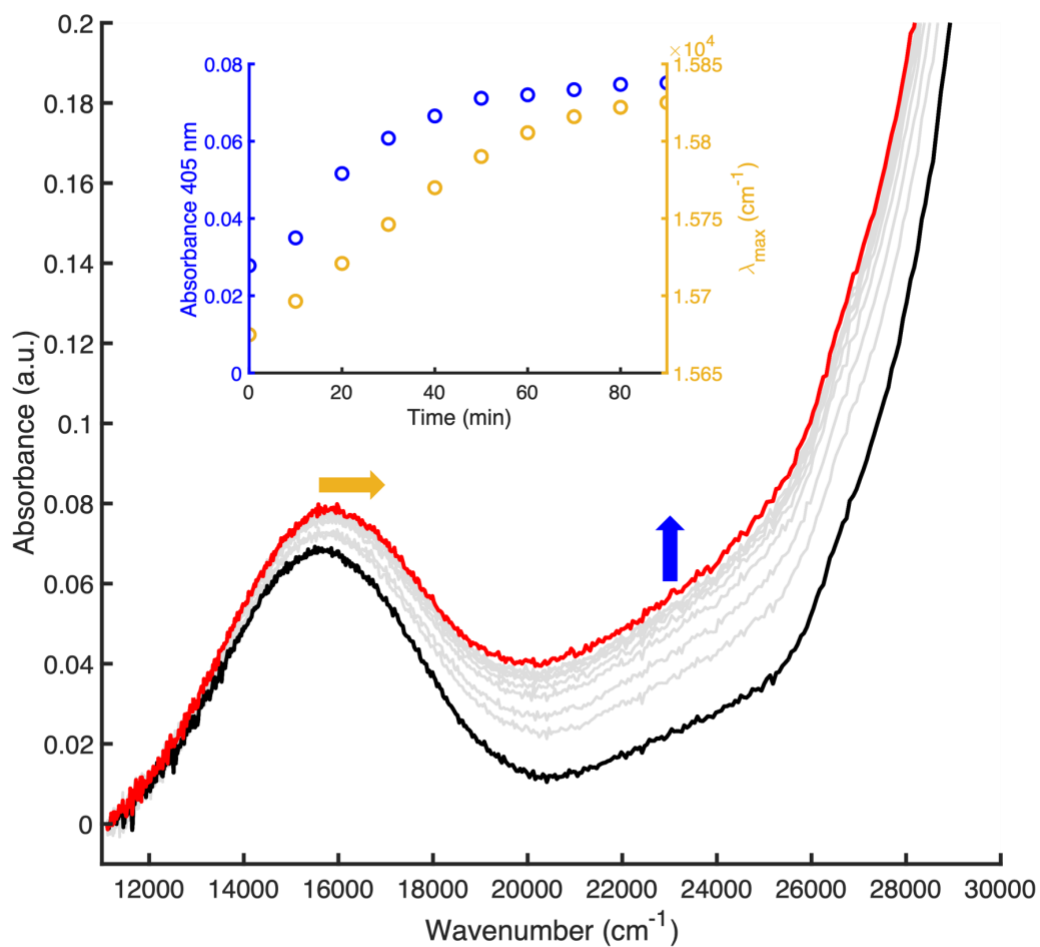

**Figure S3.** UV-vis spectra of **1** (black), **1** + 10 eq H<sub>2</sub>O<sub>2</sub> every 10 min (gray) and after 90 min (red). The shoulder at 24691 cm<sup>-1</sup> (~405 nm) grows in over time (inset, shown in blue) and the Cu d-d band shifts from λ<sub>max</sub> = 15675 cm<sup>-1</sup> to 15825 cm<sup>-1</sup> (inset, shown in yellow).

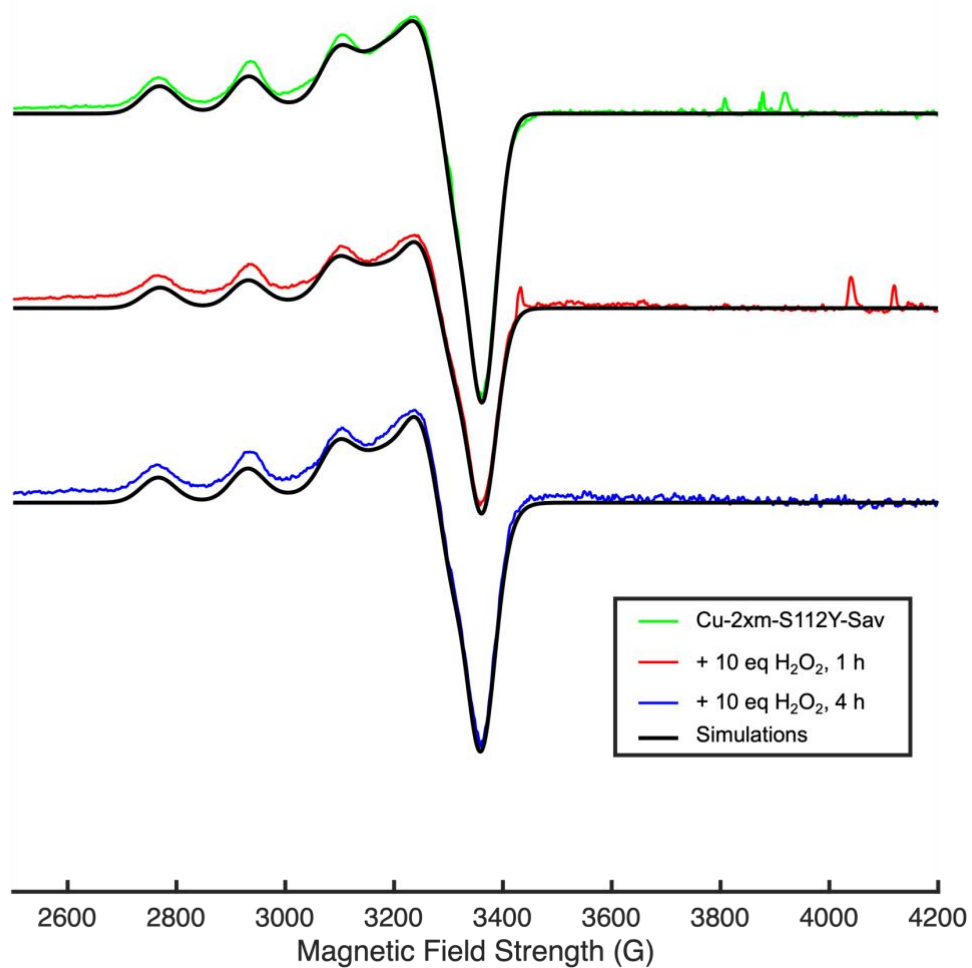

**Figure S4.** X-band EPR spectra of **1** (green), with 10 eq H<sub>2</sub>O<sub>2</sub> after 1 h (red) and after 4 h (blue). Simulations are in black lines. The *g*-values and *A*-values for simulations are given in Table S1.

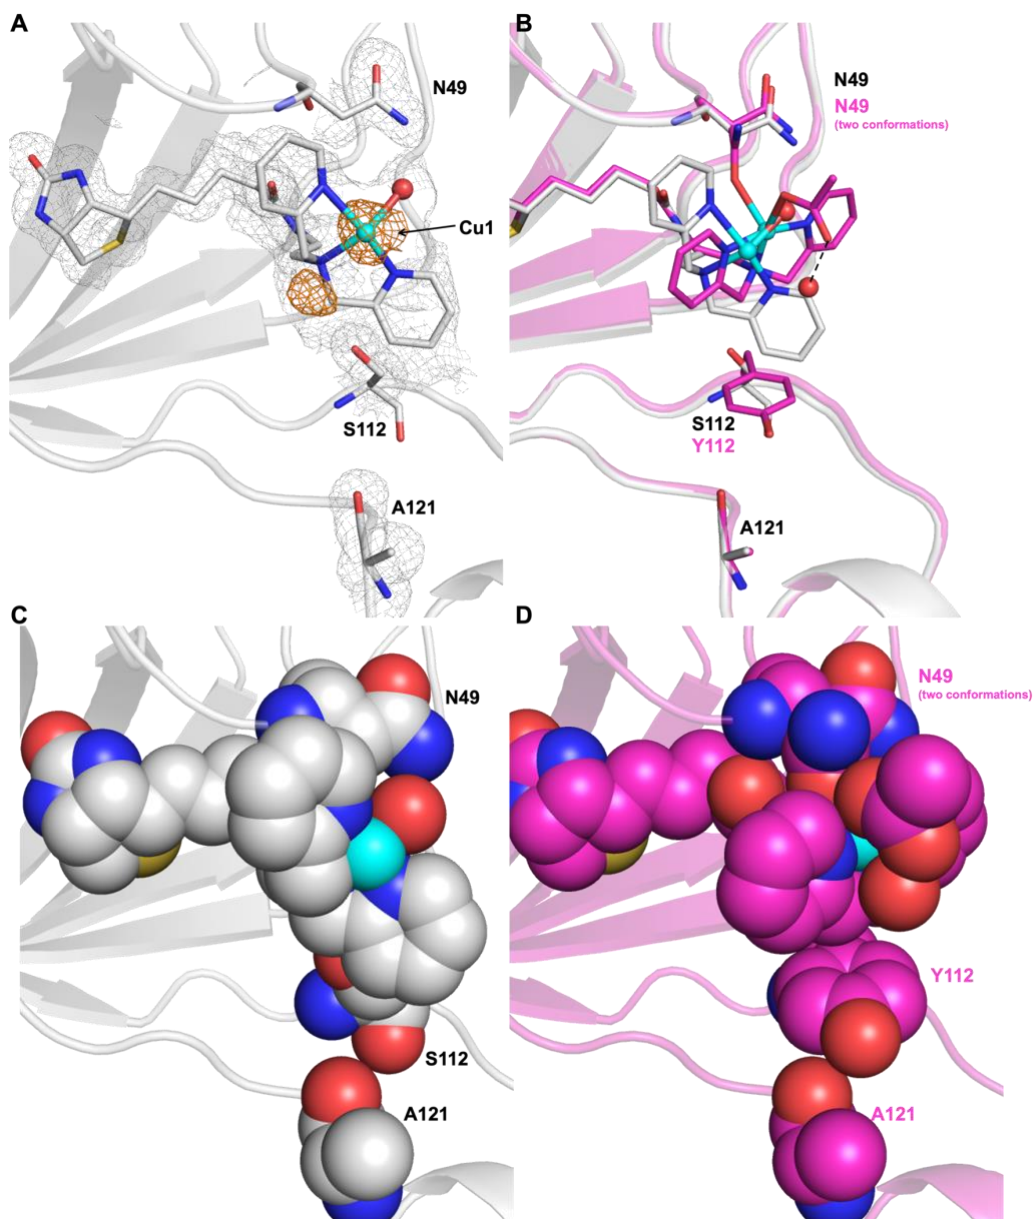

**Figure S5.** (A) Molecular model of **2** (PDB: 9CST). The protein is displayed as a cartoon and the Cu complex as well as residues N49, S112, and A121 as sticks. Copper is colored in cyan and water molecules are colored as red spheres. The position of the Cu complex as well as residues N49, S112 and A121 are indicated by the  $2F_o - F_c$  electron density shown in grey mesh contoured at  $1\sigma$ , and the Cu positions are indicated by the anomalous electron density shown in orange mesh contoured at  $3\sigma$ . Only the major conformation of the Cu complex is modeled at 66% occupancy.

(B) Overlay of molecular structures of **2** (carbon atoms represented in grey) and **1** (carbon atoms represented in pink, PDB: 9CSU). The protein is displayed as a cartoon and the Cu complex as well as N49, S/Y112, and A121 as sticks. Copper is colored in cyan and water molecules are colored as red spheres. Hydrogen bonds suggested in black dashed lines.

Sphere packing models of (C) **2** and (D) **1** suggest incorporation tyrosine at position 112 induces a preferential orientation on the cofactor, as well as shift in the copper position by 0.6 Å towards N49 compared to Cu-2xm-Sav.





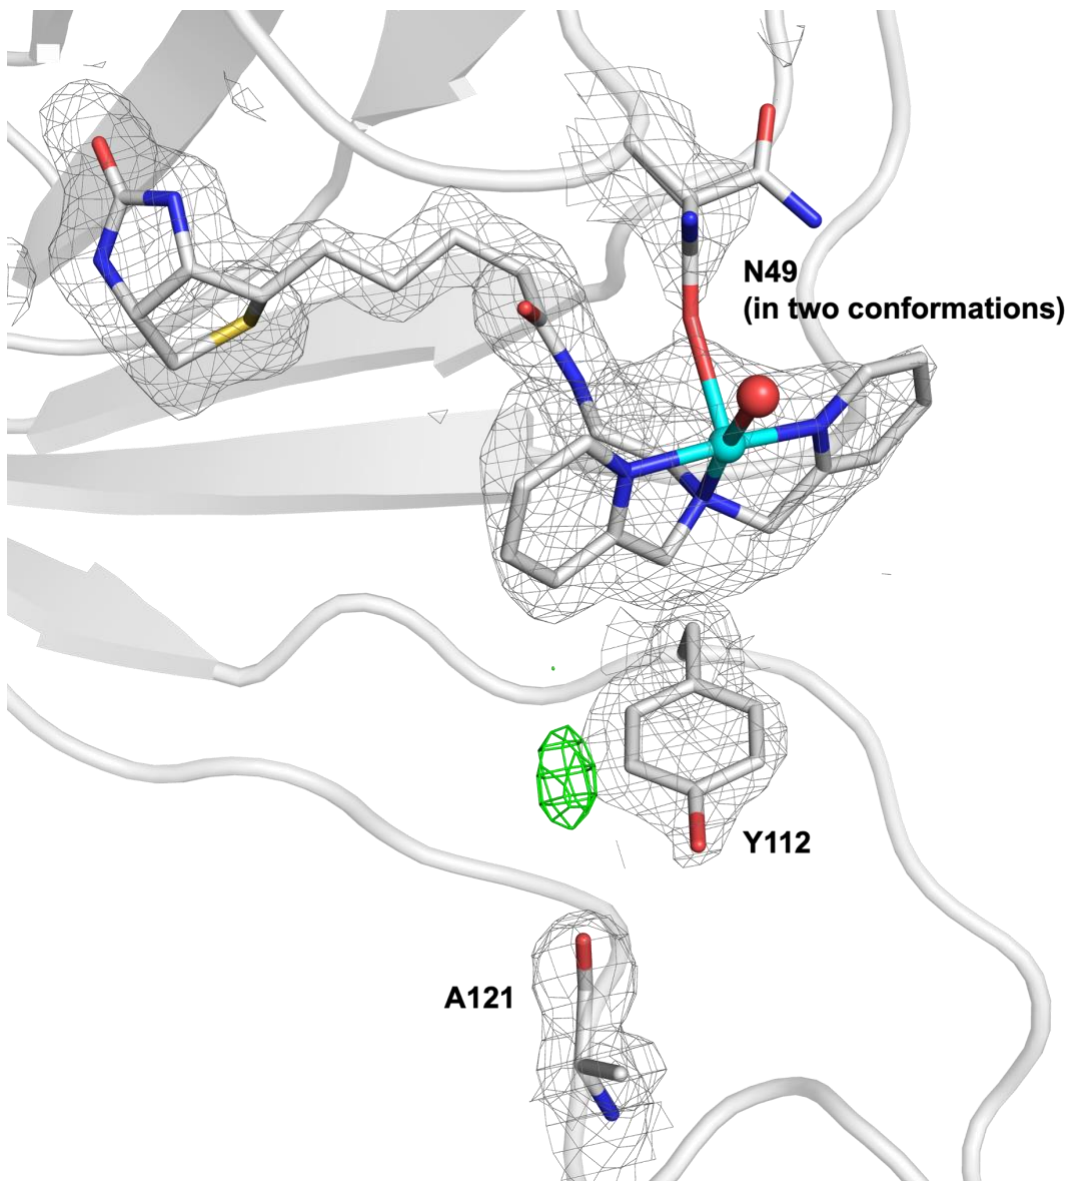

**Figure S7.** Molecular structure of **1**. The protein is displayed as cartoon representation and the Cu complex as well as residues Y112 and A121 as sticks. Copper is colored in cyan and water molecules are colored in red spheres. Positive difference density in the  $F_o-F_c$  map around Y112 contoured at  $3\sigma$  shown in green mesh. Negative difference density in the  $F_o-F_c$  map around Y112 contoured at  $3\sigma$  shown in red mesh. The position of the Cu complex as well as residues Y112 and A121 are indicated by the  $2F_o-F_c$  electron density shown in grey mesh contoured at  $1\sigma$ .

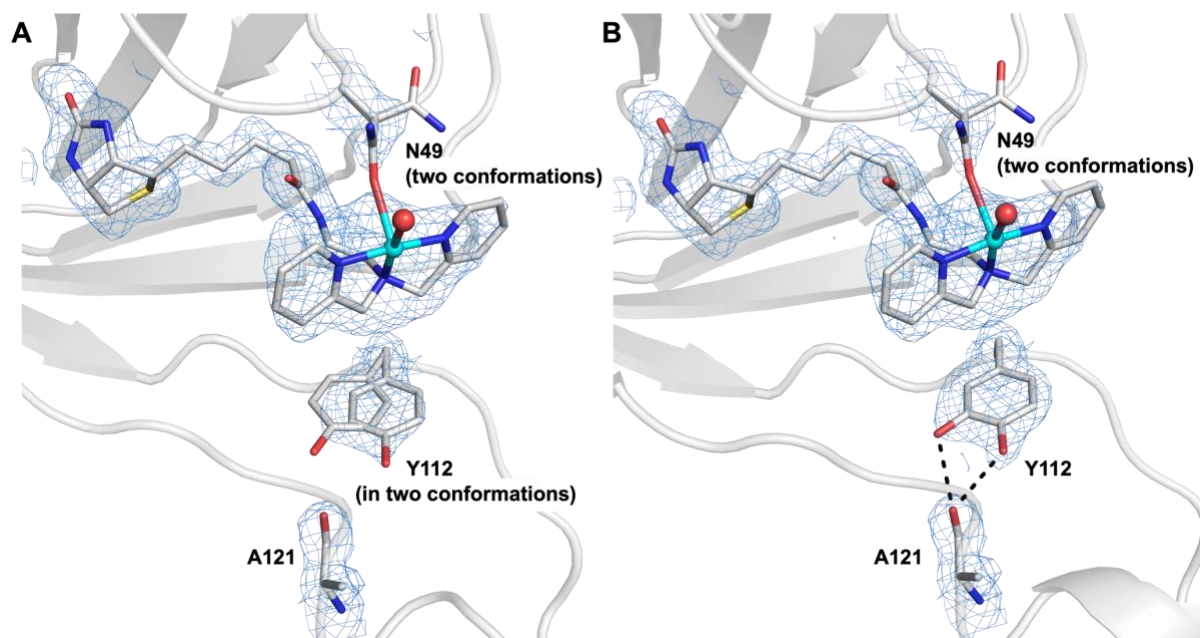

**Figure S8.** (A) Molecular model of **1** + H<sub>2</sub>O<sub>2</sub> with Y112 modeled in two rotamer conformations (not deposited to PDB), and (B) molecular model of **1** + H<sub>2</sub>O<sub>2</sub> with Y112 modeled as a catechol-like species (Same as Figure 2B, PDB: 9CSV). The protein is displayed as a cartoon and the Cu complex as well as N49, Y112 and A121 as sticks. Copper is colored in cyan and water molecules are colored as red spheres with the  $2F_o - F_c$  electron density shown in blue mesh contoured at  $1\sigma$ . Hydrogen bonds are suggested in black dashed lines. Refinement statistics for this model in comparison to the model of oxidized Y112 are listed in Table S6.

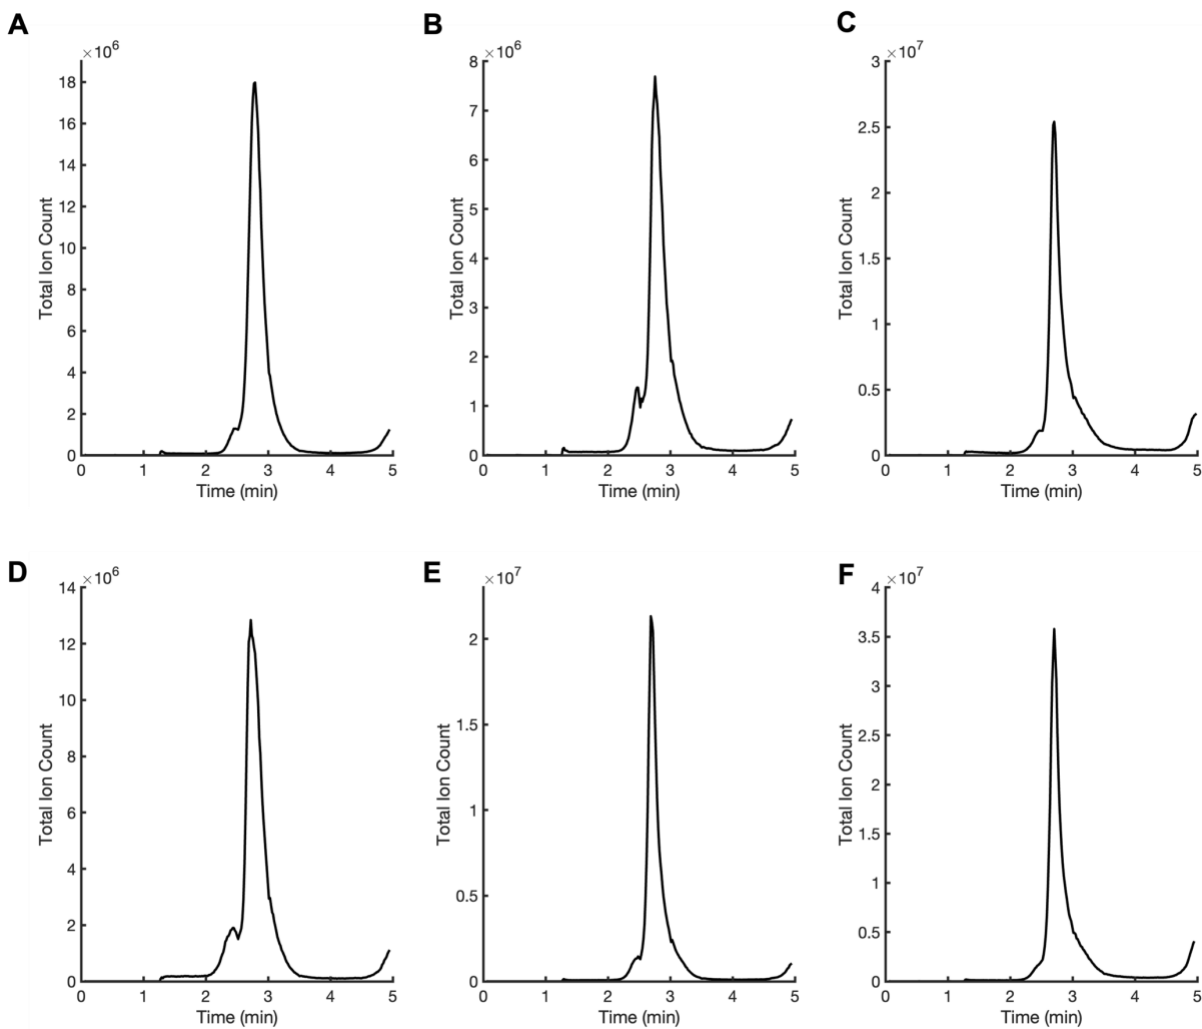

**Figure S9.** Chromatograms of (A) **2**, (B) **1**, (C) **3**, (D) **2** +  $H_2O_2$ , (E) **1** +  $H_2O_2$ , and (F) **3** +  $H_2O_2$ . The major peak of each chromatogram was integrated at full width/half maximum for further analysis.

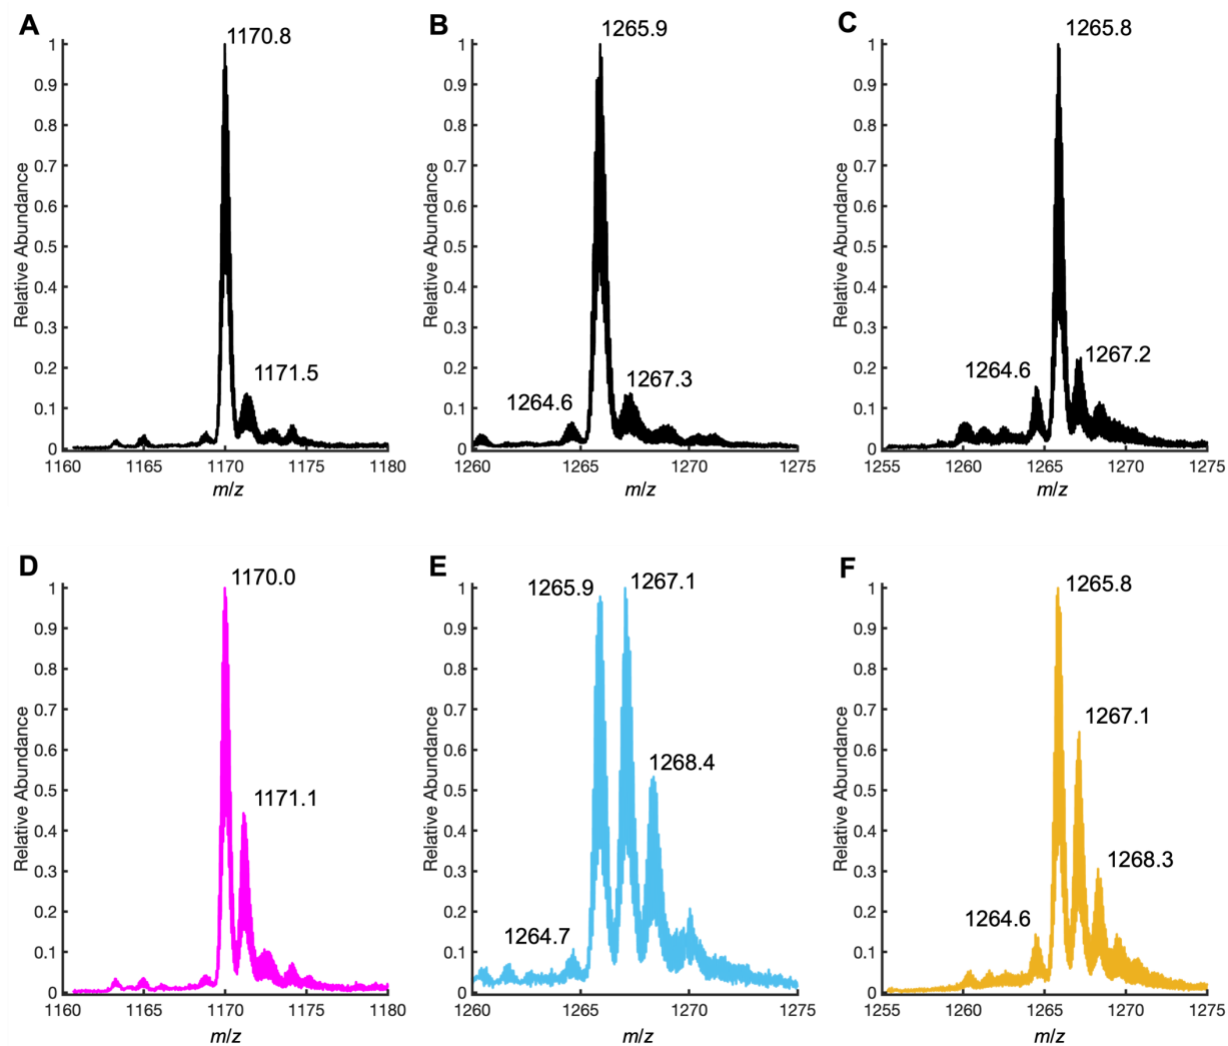

**Figure S10.** ESI-Q-TOF positive ion mode mass spectra showing ions of highest abundance from integration of the major peaks of the chromatograms of (A) **2**, (B) **1**, (C) **3**, (D) **2** + H<sub>2</sub>O<sub>2</sub>, (E) Cu-**1** + H<sub>2</sub>O<sub>2</sub>, and (F) **3** + H<sub>2</sub>O<sub>2</sub>. The charge-state ion series containing these ions were used to reconstruct total average mass spectra shown in Figure 3.

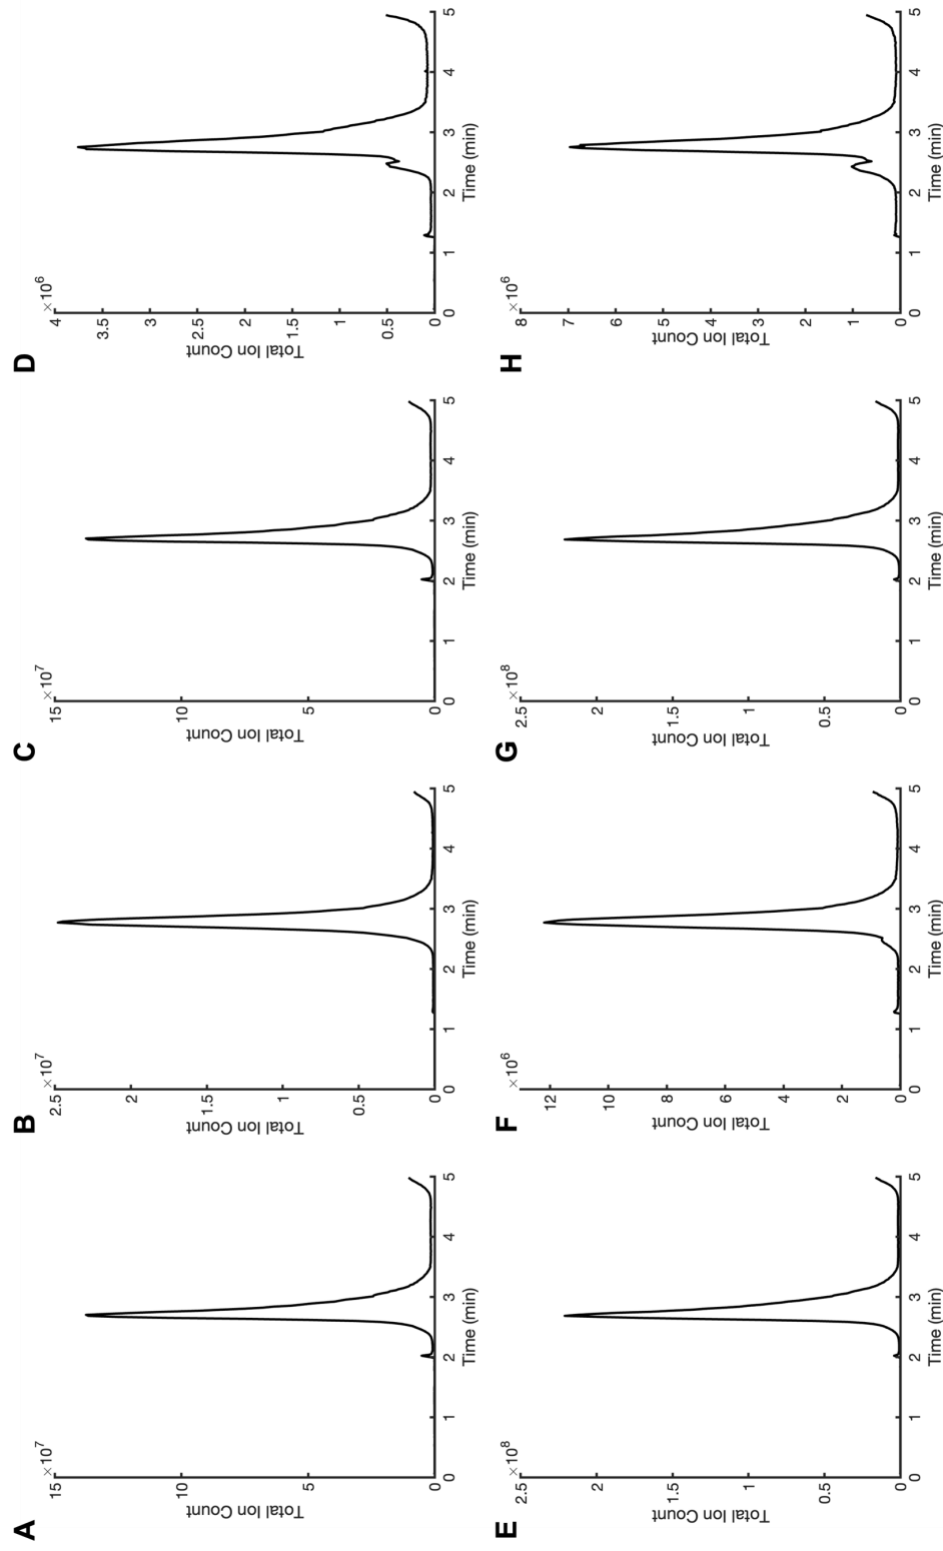

**Figure S11.** Chromatograms of (A) apo-2xm-Sav, (B) biot-2xm-Sav, (C) apo-2xm-S112Y-Sav, (D) biot-2xm-S112Y-Sav, (E) apo-2xm-Sav + H<sub>2</sub>O<sub>2</sub>, (F) biot-2xm-Sav + H<sub>2</sub>O<sub>2</sub>, (G) apo-2xm-S112Y-Sav + H<sub>2</sub>O<sub>2</sub>, and (H) biot-2xm-S112Y-Sav + H<sub>2</sub>O<sub>2</sub>. The major peak of each chromatogram was integrated at full width/half maximum for further analysis.

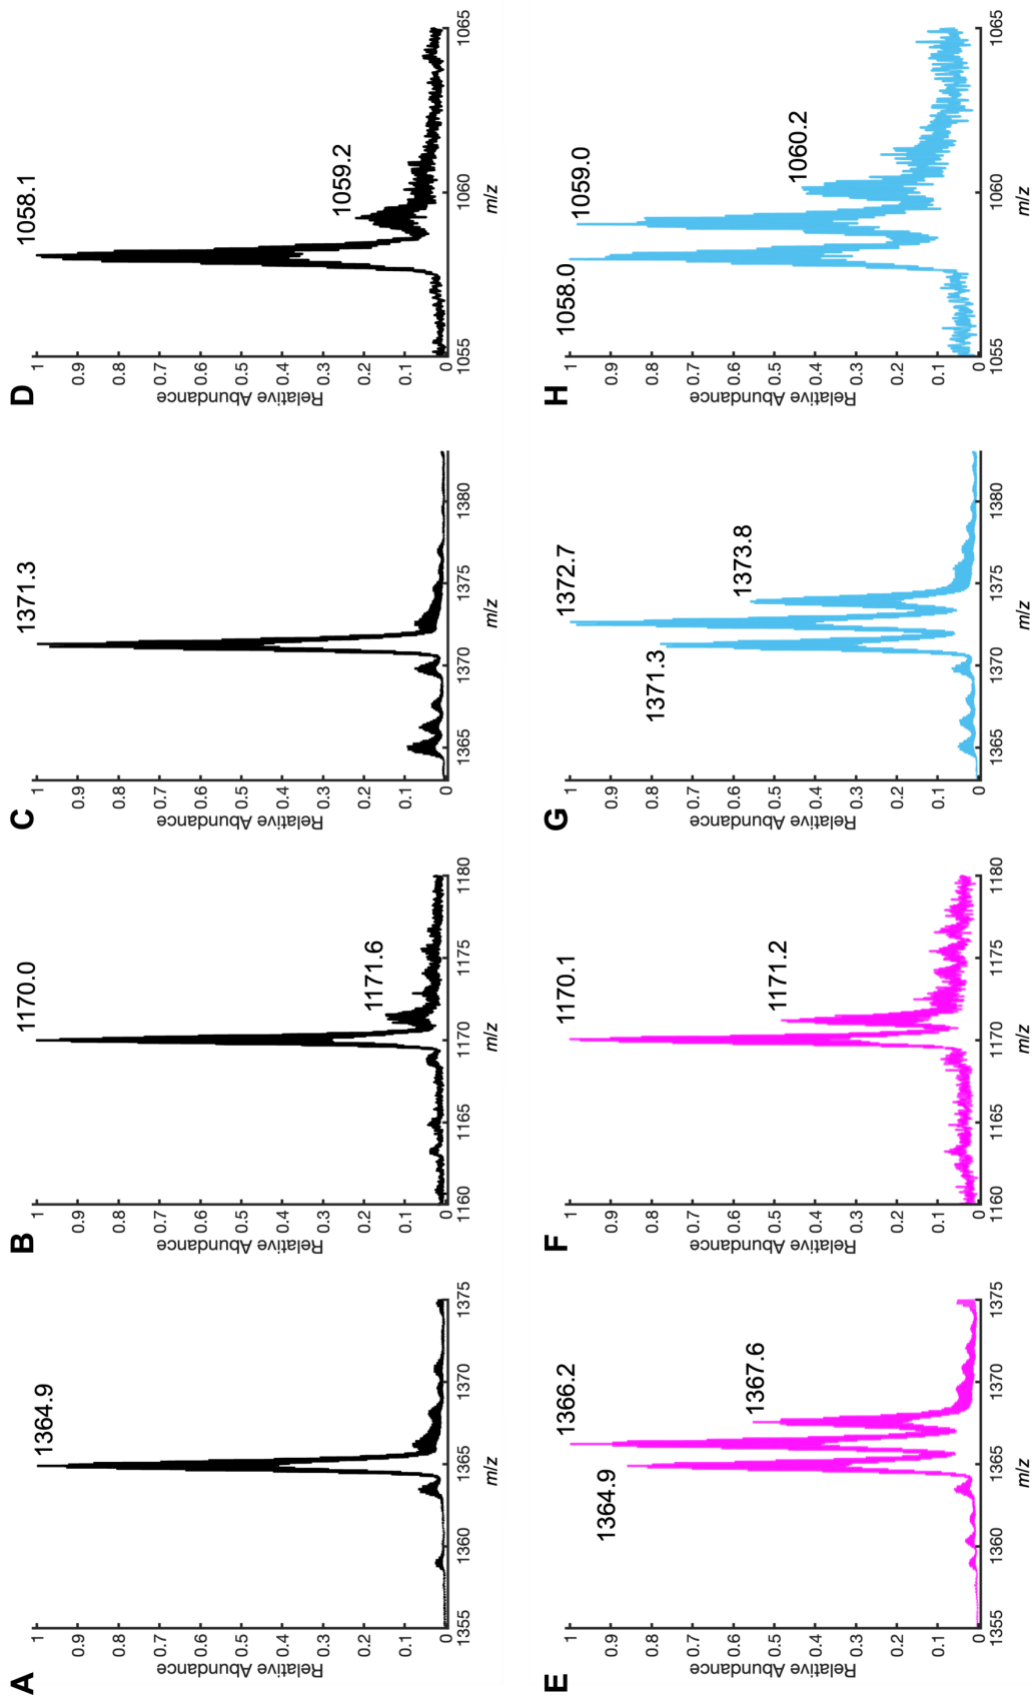

**Figure S12.** ESI-Q-TOF positive ion mode mass spectra showing ions of highest abundance from integration of major peak of chromatogram of (A) apo-2xm-Sav, (B) biot-2xm-Sav, (C) apo-2xm-S112Y-Sav, (D) biot-2xm-S112Y-Sav, (E) apo-2xm-Sav + H<sub>2</sub>O<sub>2</sub>, (F) biot-2xm-Sav + H<sub>2</sub>O<sub>2</sub>, (G) apo-2xm-S112Y-Sav + H<sub>2</sub>O<sub>2</sub>, and (H) biot-2xm-S112Y-Sav + H<sub>2</sub>O<sub>2</sub>. The charge-state ion series containing these ions were used to reconstruct total average mass spectra shown in Figure S12.

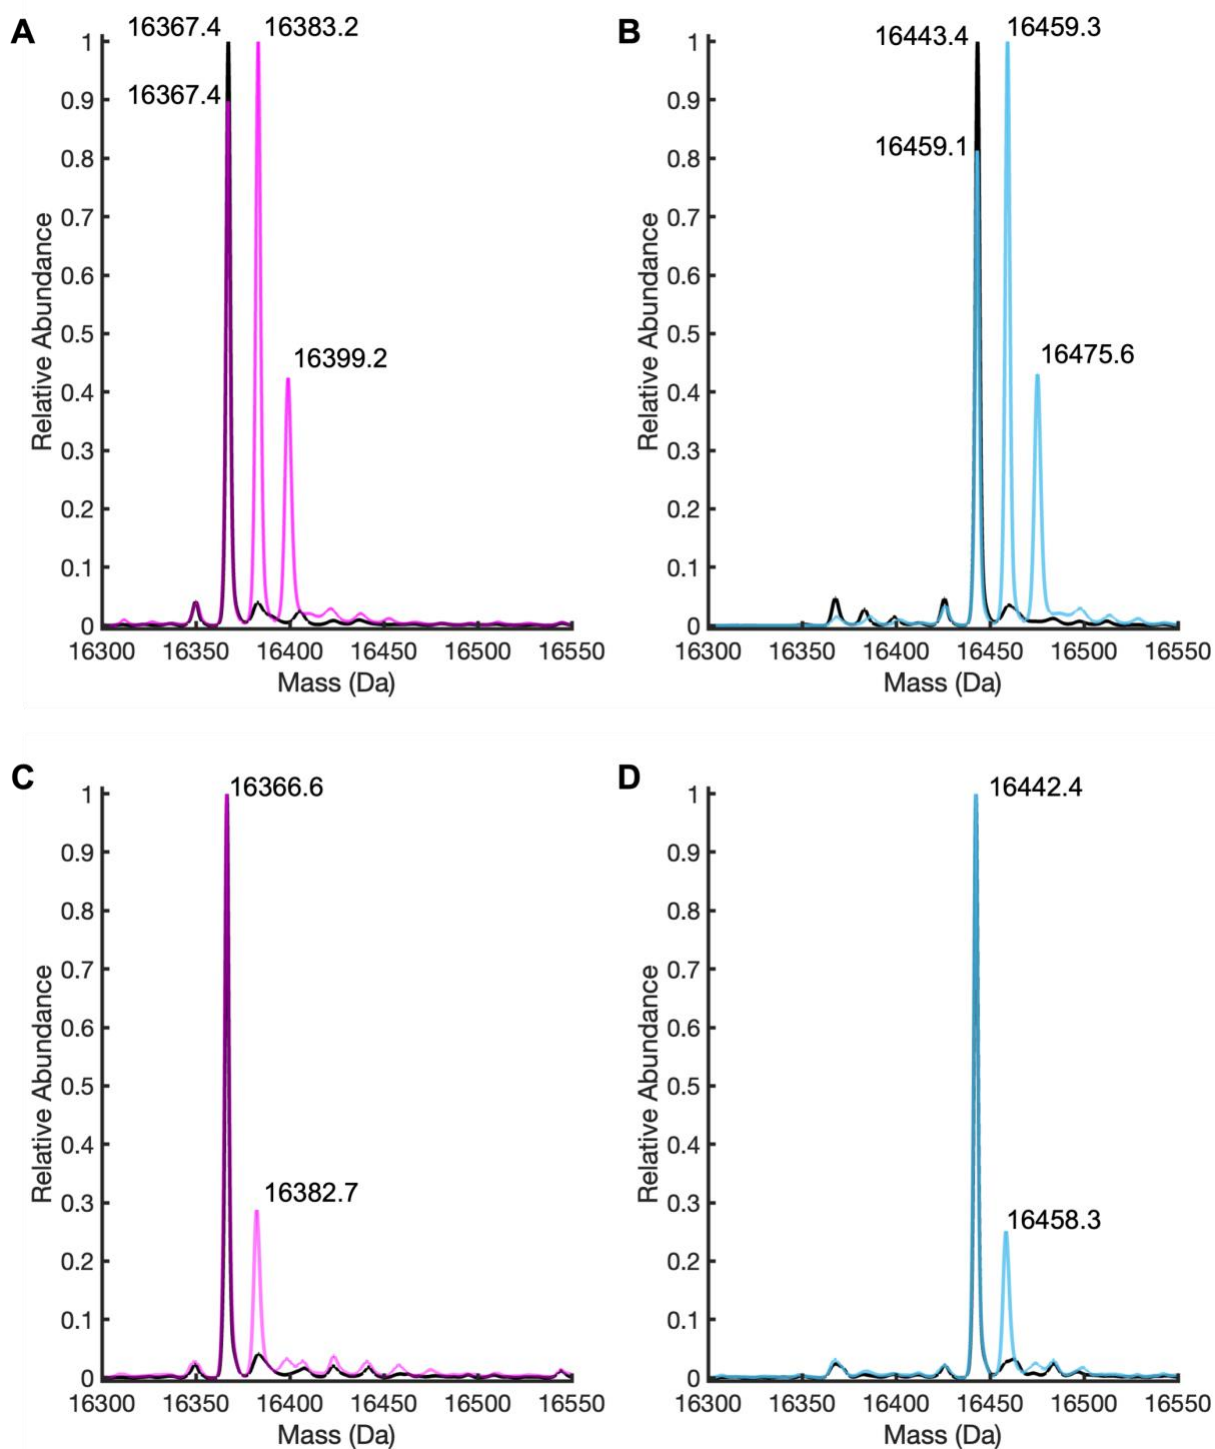

**Figure S13.** Deconvoluted ESI-Q-TOF positive ion mode mass spectra of (A) apo-2xm-Sav, (B) apo-2xm-S112Y-Sav, (C) biot-2xm-Sav, and (D) biot-2xm-S112Y-Sav. Before addition of  $\text{H}_2\text{O}_2$  shown in black and after 1 h incubation with 10 eq  $\text{H}_2\text{O}_2$  shown in pink/blue for each panel. Overall oxidation of intact Sav is enhanced in all apo-Sav variants compared to biot-Sav variants, which is possibly due to ligand binding precluding access of  $\text{H}_2\text{O}_2$  to oxidizable residues



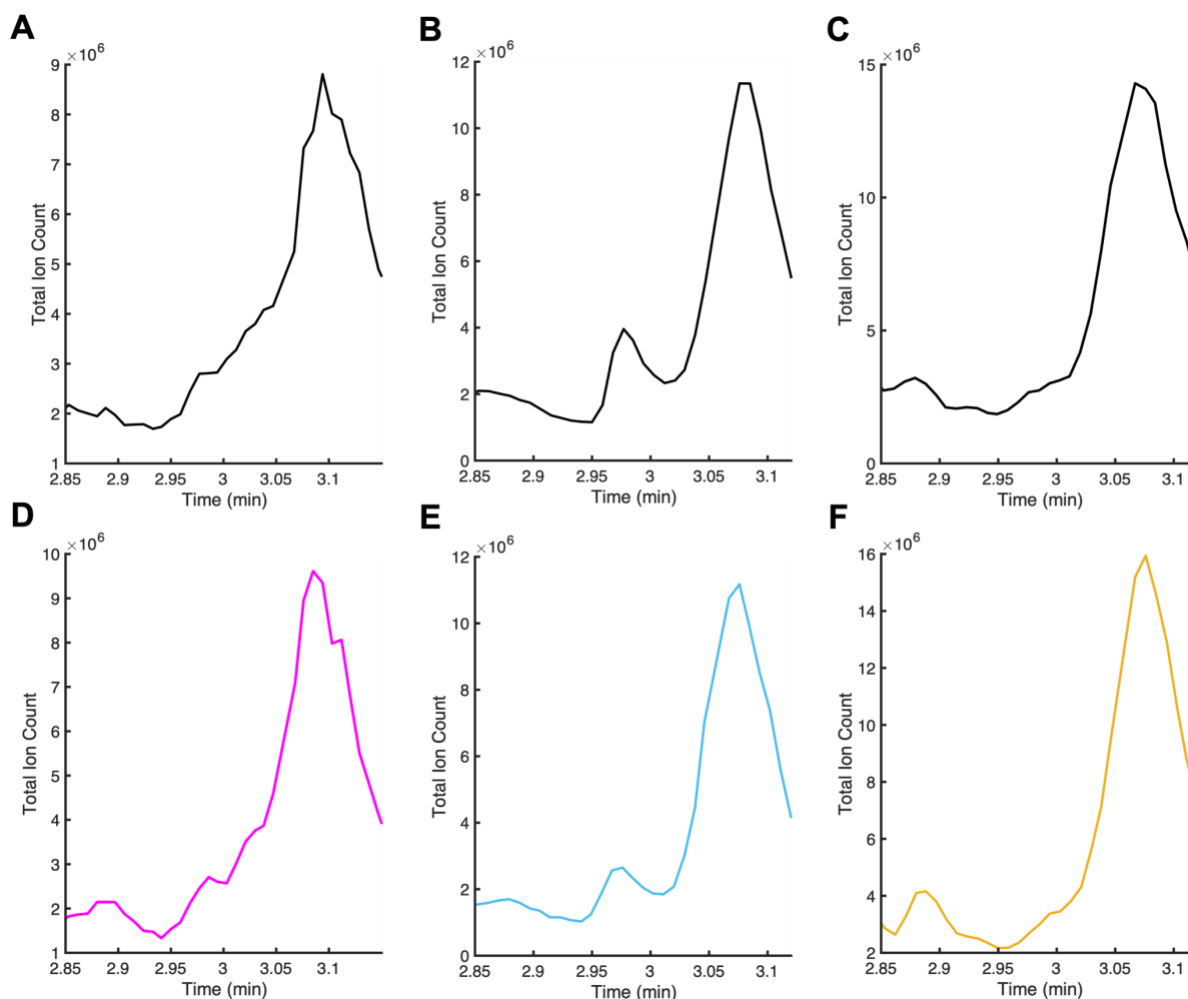

**Figure S14.** Area of chromatogram after trypsin digestion of (A) biot-2xm-Sav, (B) biot-2xm-S112Y-Sav, (C) biot-2xm-S112Y-K121Y-Sav, (D) biot-2xm-Sav + H<sub>2</sub>O<sub>2</sub>, (E) biot-2xm-S112Y-Sav + H<sub>2</sub>O<sub>2</sub>, and (F) biot-2xm-K121Y-Sav + H<sub>2</sub>O<sub>2</sub>. The chromatograms were integrated over this entire range, from 2.85 to 3.12 min, for all samples to capture the relative abundance of both the unoxidized and oxidized DF31. Mass spectra resulting from integration of this range are shown in figure S14.

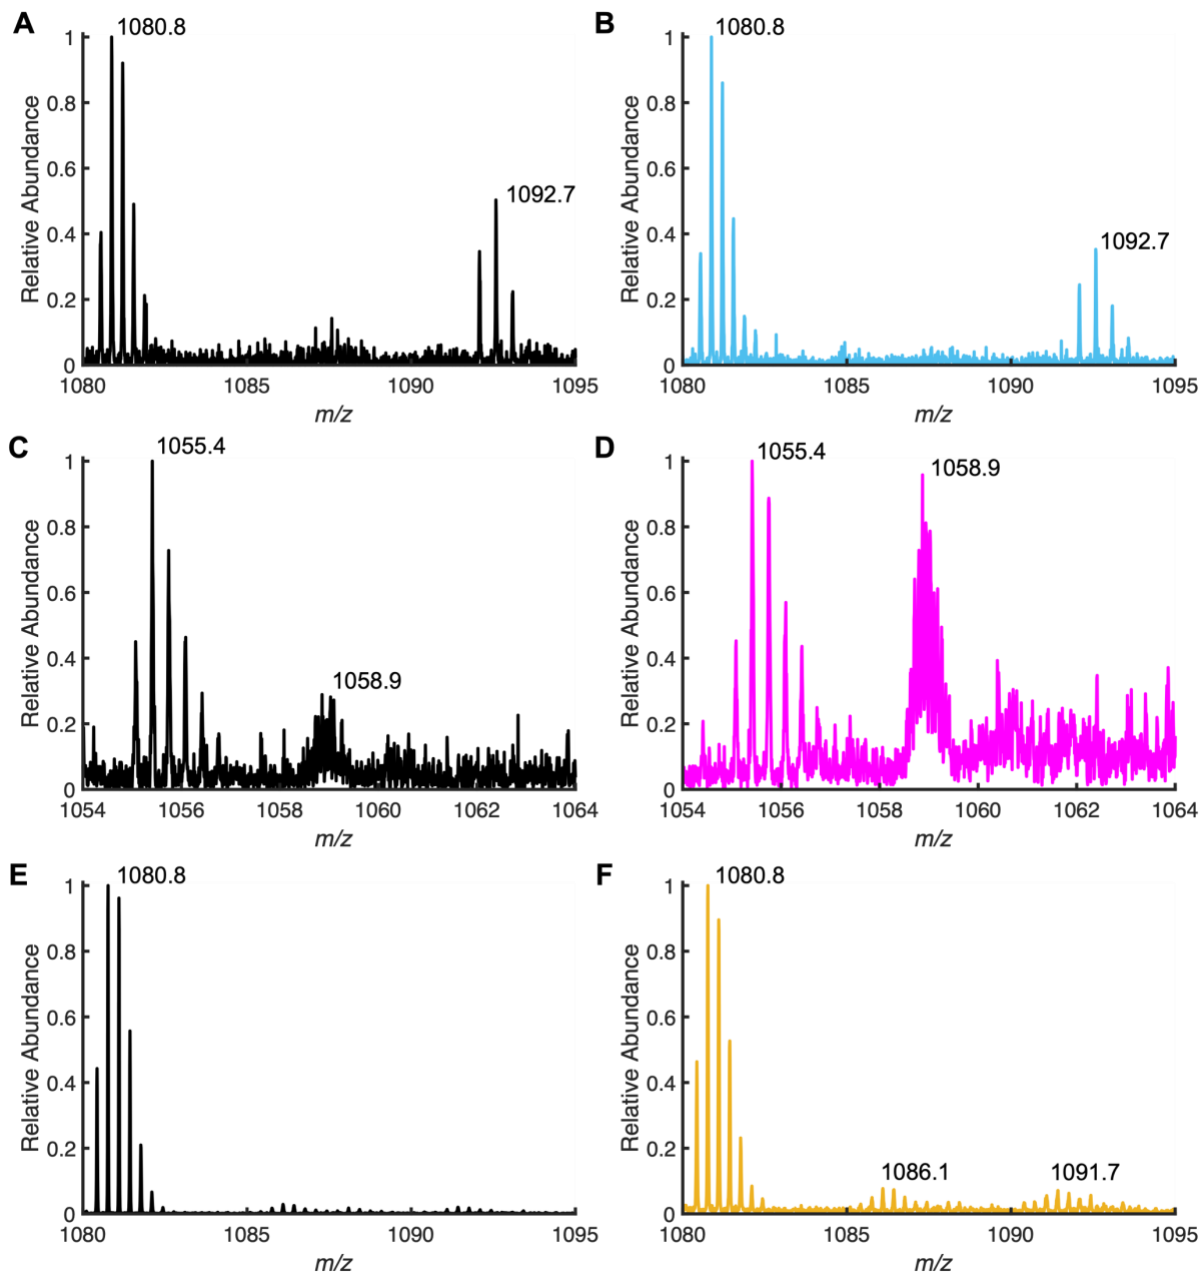

**Figure S15.** ESI-Q-TOF positive ion mode mass spectra of  $[\text{DF31}]^{3+}$  resulting from tryptic digests: (A) biot-2xm-S112Y-Sav before and (B) after the addition of 10 equivalents of  $\text{H}_2\text{O}_2$  and incubation for 1 h. (C) Biot-2xm-Sav before and (D) after the addition of 10 equivalents of  $\text{H}_2\text{O}_2$  and incubation for 1 h. (E) Biot-2xm-K121Y-Sav before and (F) after the addition of 10 equivalents of  $\text{H}_2\text{O}_2$  and incubation for 1 h.

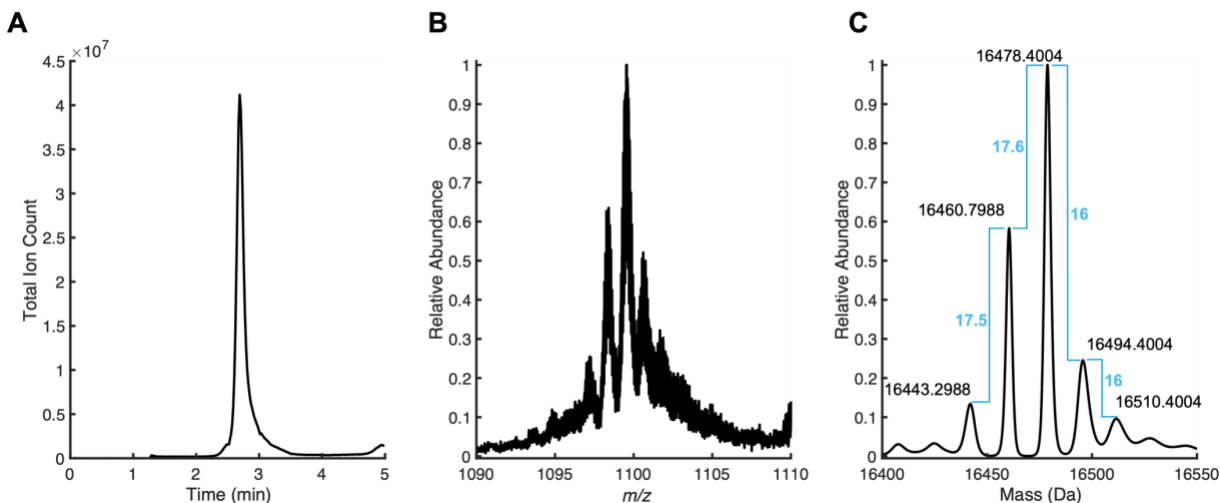

**Figure S16.** (A) Chromatogram of **1** incubated with  $^{18}\text{O}_2\text{H}_2$ . The major peak was integrated for further processing.

(B) ESI-Q-TOF positive ion mode mass spectra showing ions of highest abundance from integration of the major peaks of the chromatogram of **1** incubated with  $^{18}\text{O}_2\text{H}_2$ . The charge-state ion series containing these ions were used to reconstruct total average mass spectra shown in panel C.

(C) Deconvoluted ESI-Q-TOF positive ion mode mass spectrum of **1** incubated with  $^{18}\text{O}_2\text{H}_2$ . The nominal mass of 2xm-S112Y-Sav monomer is 16443.2998 Da. We observe two species that are consistent with the incorporation of  $^{18}\text{O}$  derived from 90% isotope labeled  $^{18}\text{O}_2\text{H}_2$ . There are two more species consistent with nonspecific oxidation derived from  $^{16}\text{O}$ .

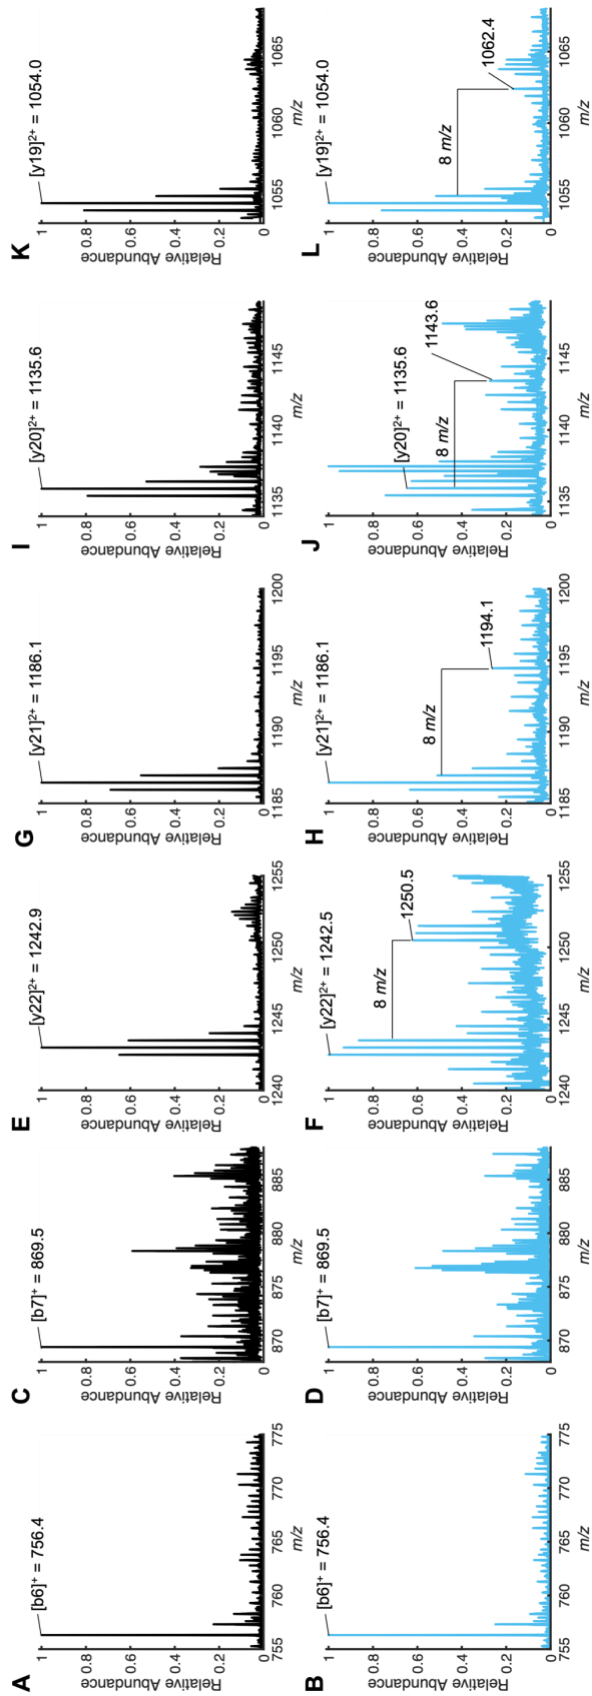

**Figure S17.** MS/MS analysis of b/y ion fragments of DF31 resulting from tryptic digestion of residue Y112. Fragment b6 (A) before and (B) after incubation with H<sub>2</sub>O<sub>2</sub>, (C) and fragment b7 before and (D) after incubation with H<sub>2</sub>O<sub>2</sub> are not oxidized, ruling out oxidation of residues 104-110. Fragment y22, y21, and y20 (E, G, I) before and (F, H, J) after incubation with H<sub>2</sub>O<sub>2</sub>. Oxidized fragments of y22, y21, and y20 appear after incubation with H<sub>2</sub>O<sub>2</sub>. (L) oxidation of W120 or H127 is also suggested by appearance of oxidized fragment y19 after incubation with H<sub>2</sub>O<sub>2</sub> as y19 does not contain Y112.

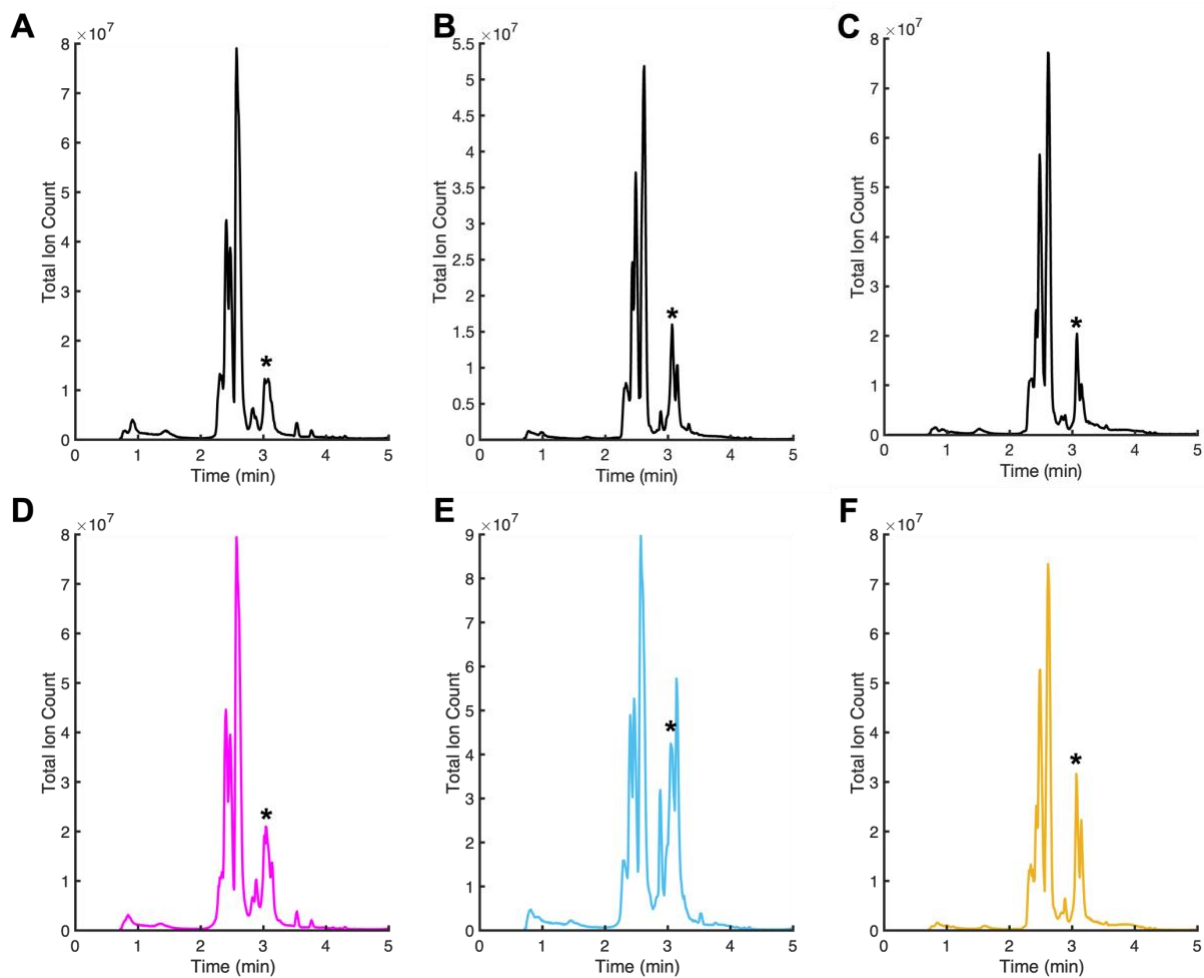

**Figure S18.** Chromatograms after trypsin digestion of (A) **2**, (B) **1**, (C) **3**, (D) **2** +  $H_2O_2$ , (E) **1** +  $H_2O_2$ , and (F) **3** +  $H_2O_2$ . Asterisks indicate chromatographic peaks containing DF31 in each sample.

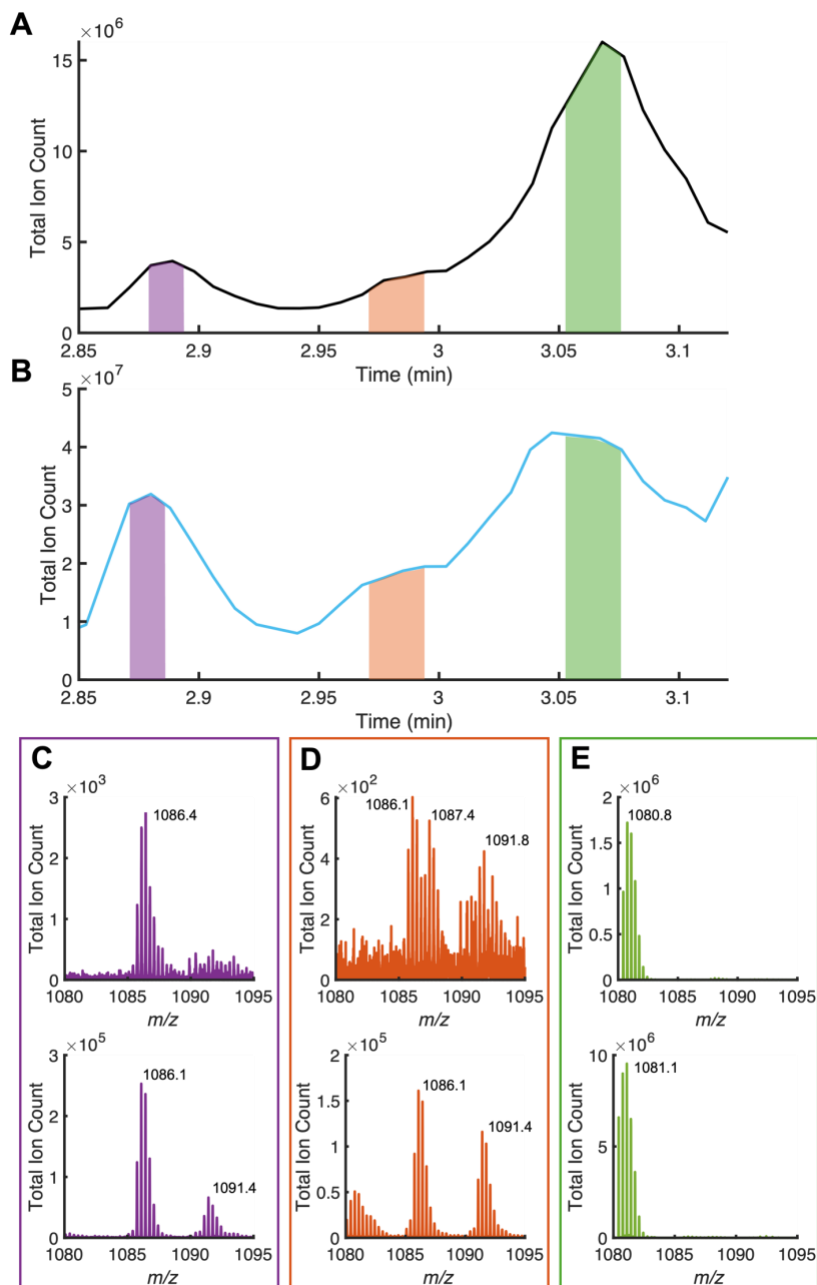

**Figure S19.** Total area of chromatograms integrated to produce mass spectra in Figure 4 for (A) **1** and (B) **1** + H<sub>2</sub>O<sub>2</sub>. Integrated area of chromatographic peak eluting at 2.87 min highlighted in purple to produce mass spectra in panel C for **1** (C, top) and **1** + 10 eq H<sub>2</sub>O<sub>2</sub> (C, bottom). Integrated area of chromatographic peak eluting at 2.97 min highlighted in orange to produce mass spectra in panel D for **1** (D, top) and **1** + 10 eq H<sub>2</sub>O<sub>2</sub> (D, bottom). Integrated area of chromatographic peak eluting at 3.06 min highlighted in green to produce mass spectra in panel E for **1** (E, top) and **1** + 10 eq H<sub>2</sub>O<sub>2</sub> (E, bottom). Because of the presence of oxidized DF31 in **1** with and without H<sub>2</sub>O<sub>2</sub> incubation (C and D top), the chromatograms were integrated over this entire range, from 2.85 to 3.12 min, for all samples to capture the relative abundance of both the unoxidized and oxidized DF31.

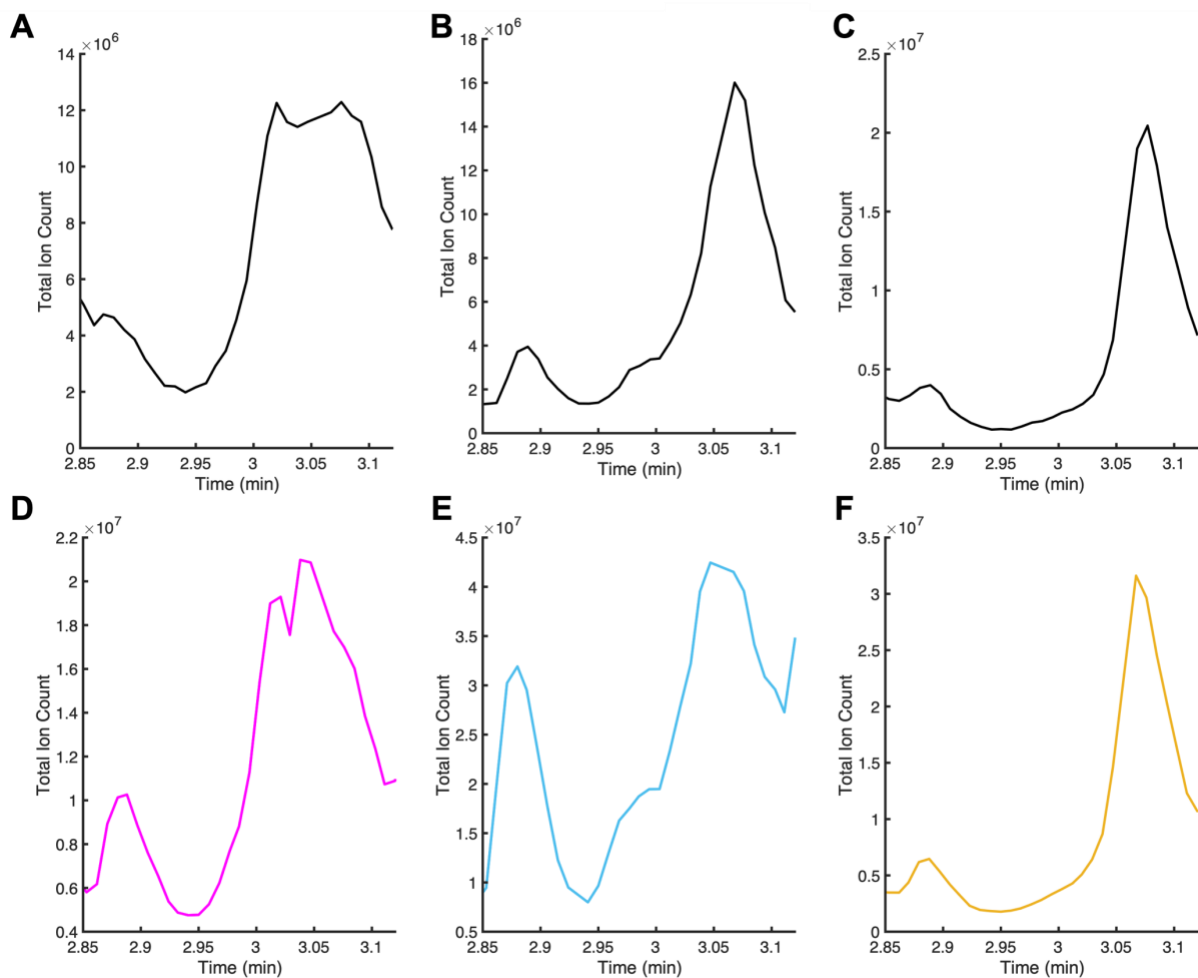

**Figure S20.** Integrated area of chromatogram after trypsin digestion of (A) **2**, (B) **1**, (C) **3**, (D) **2** + 10 eq H<sub>2</sub>O<sub>2</sub>, (E) **1** + 10 eq H<sub>2</sub>O<sub>2</sub>, and (F) **3** + 10 eq H<sub>2</sub>O<sub>2</sub>. Mass spectra resulting from integration of this area is displayed in Figure 4.

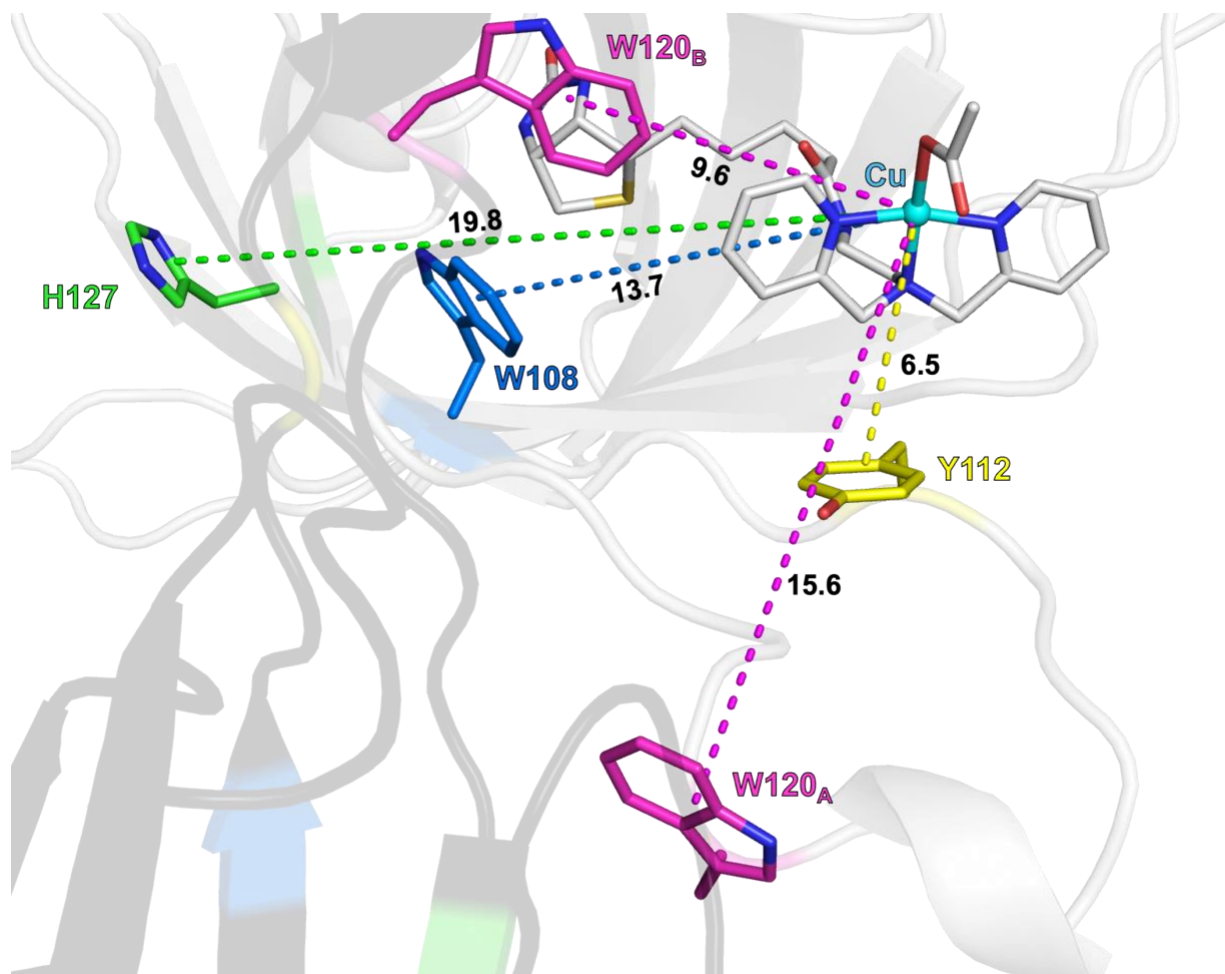

**Figure S21.** Molecular model of **1** (PDB: 9CSU). The protein is displayed as a cartoon and the Cu complex as well as residues W108, Y112, W120, and H127 are displayed as sticks. One monomeric subunit of Sav is shown in gray (deonted as A) and the adjacent symmetry related subunit (denoted as B) is shown in black. Residues in DF31 known to be susceptible to oxidation are displayed in blue, yellow, pink or green with the corresponding colored dashed lines indicating the distance from the copper center. Residue Y112 of the same subunit is the closest residue to the Cu center, making it most susceptible to Cu-mediated oxidation by H<sub>2</sub>O<sub>2</sub>.



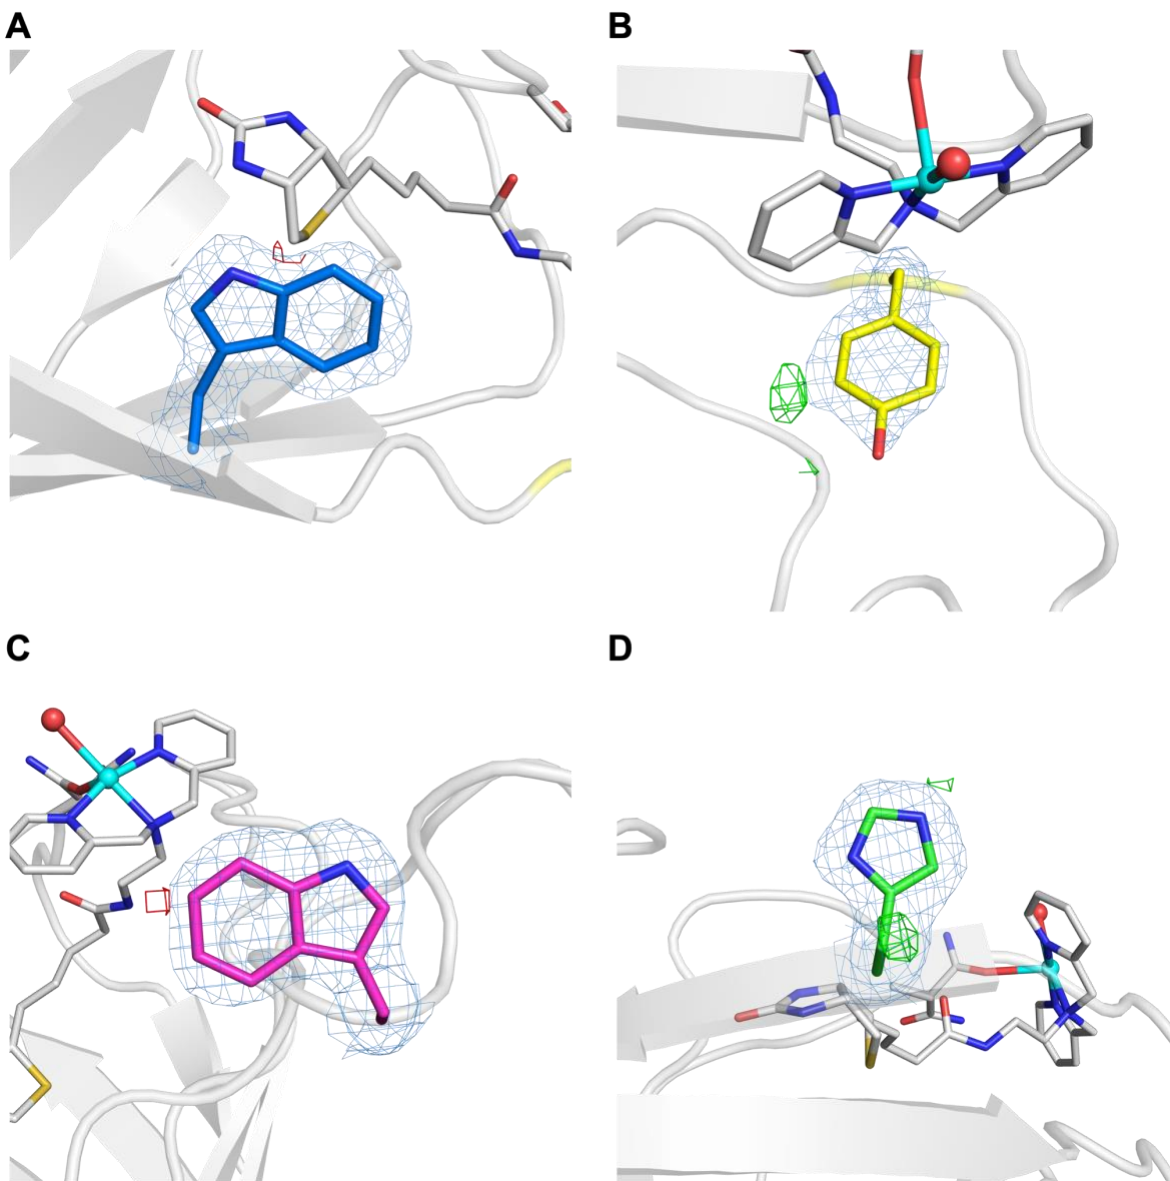

**Figure S22.** Molecular model of **1** + H<sub>2</sub>O<sub>2</sub>. The protein is displayed as a cartoon and Cu-cofactor as well as residues (A) W108, (B) Y112, (C) W120, and (D) H127 (residues of DF31 that may be susceptible to oxidation by H<sub>2</sub>O<sub>2</sub>) are displayed as sticks. Positive and negative difference density in  $F_o-F_c$  map around each residue contoured at  $3\sigma$  shown in green and red mesh, respectively. The positions of the residues are indicated by the  $2F_o-F_c$  electron density shown in blue mesh contoured at  $1\sigma$ .

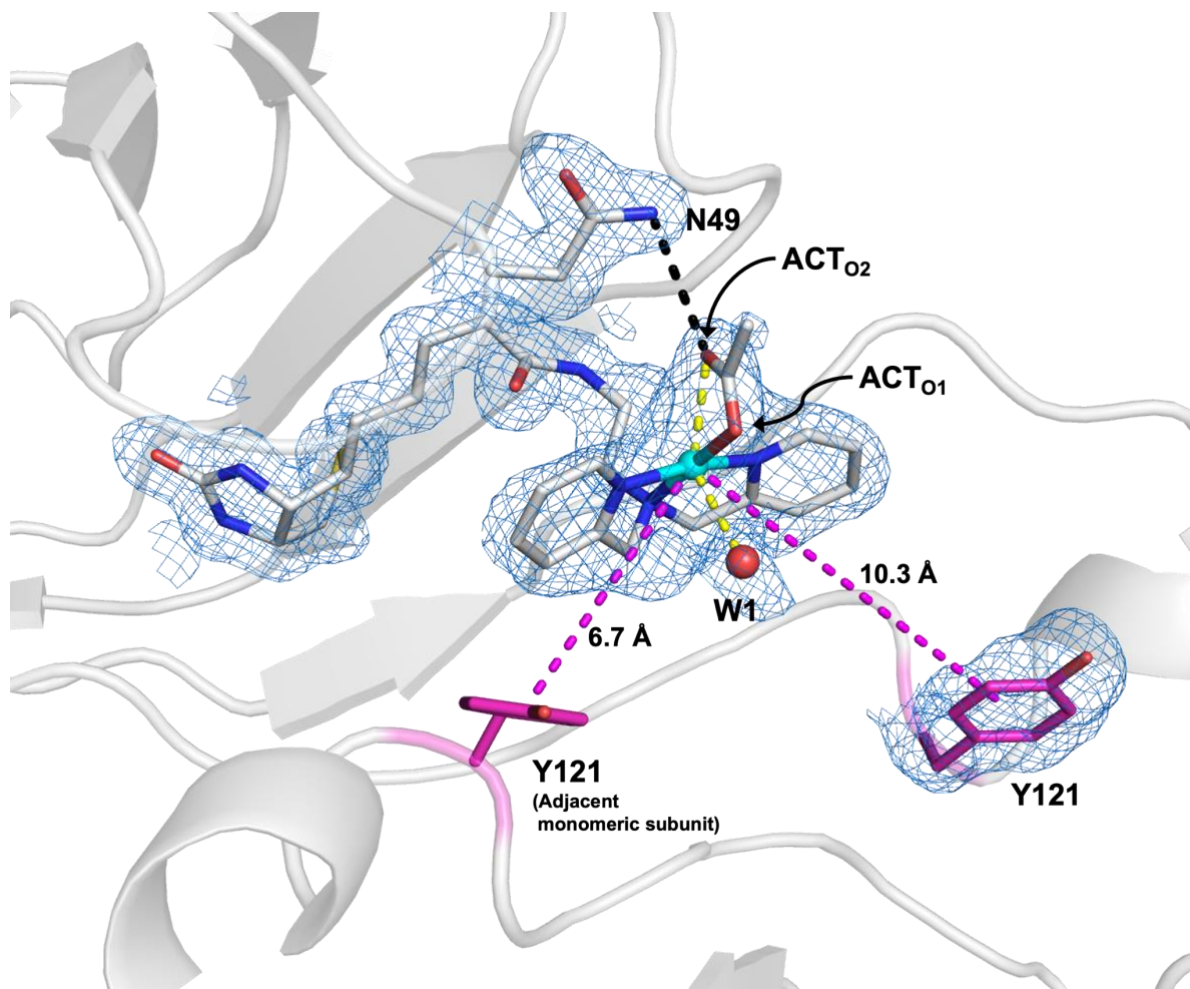

**Figure S23.** Molecular model of **3** (PDB: 9CSW). The protein is displayed in cartoon and the Cu complex as well as residues N49 and A121Y are displayed in sticks. Copper is colored in cyan and water molecules in red spheres. The position of the Cu-complex as well as residues N49 and Y121 are indicated by the  $2F_o-F_c$  electron density shown in blue mesh contoured at  $1\sigma$ . Residue Y121 is shown in magenta and is 6.7 Å (adjacent monomeric Sav subunit) or 10.3 Å (same monomeric Sav subunit) from the Cu center where distances are indicated by magenta dashed lines. Hydrogen bonds are suggested in black dashed lines. The Cu- $ACT_{O1}$  and Cu-W1 distances are 2.5 and 2.6 Å, respectively, indicated by yellow dashed lines.

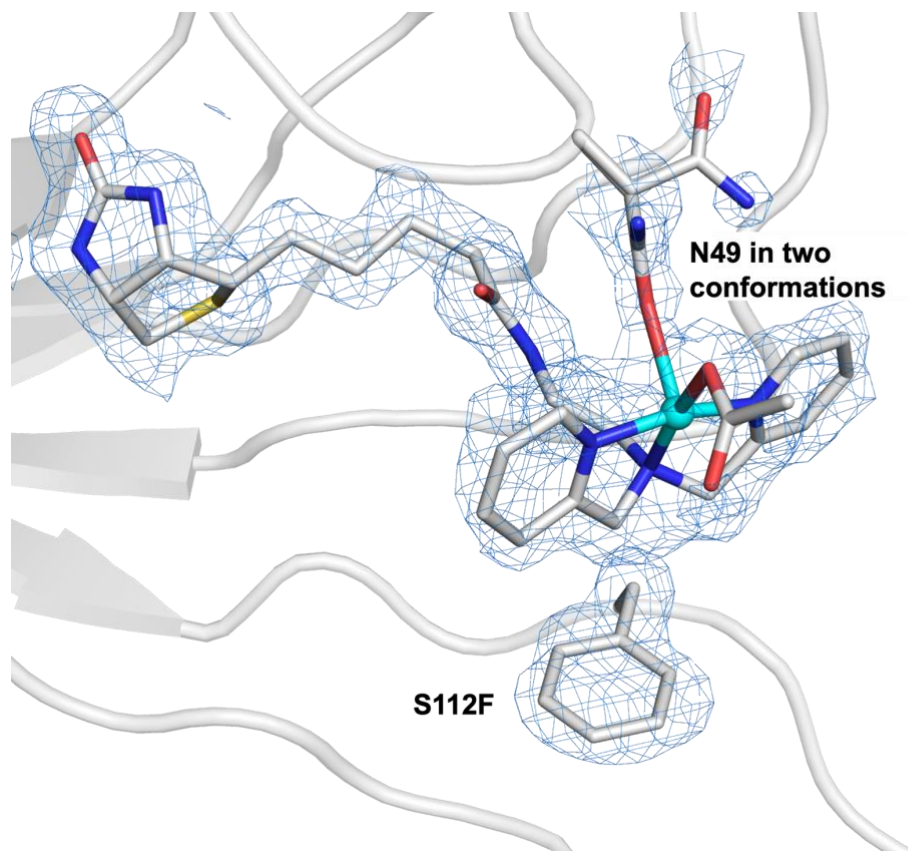

**Figure S24.** Molecular model of **4** (PDB: 9E6Z). The protein is displayed in cartoon and the Cu complex as well as residues N49 and S112F are displayed in sticks. Copper is colored in cyan and water molecules in red spheres. The position of the Cu-complex as well as residues N49 and F112 are indicated by the  $2F_o - F_c$  electron density shown in blue mesh contoured at  $1\sigma$ .

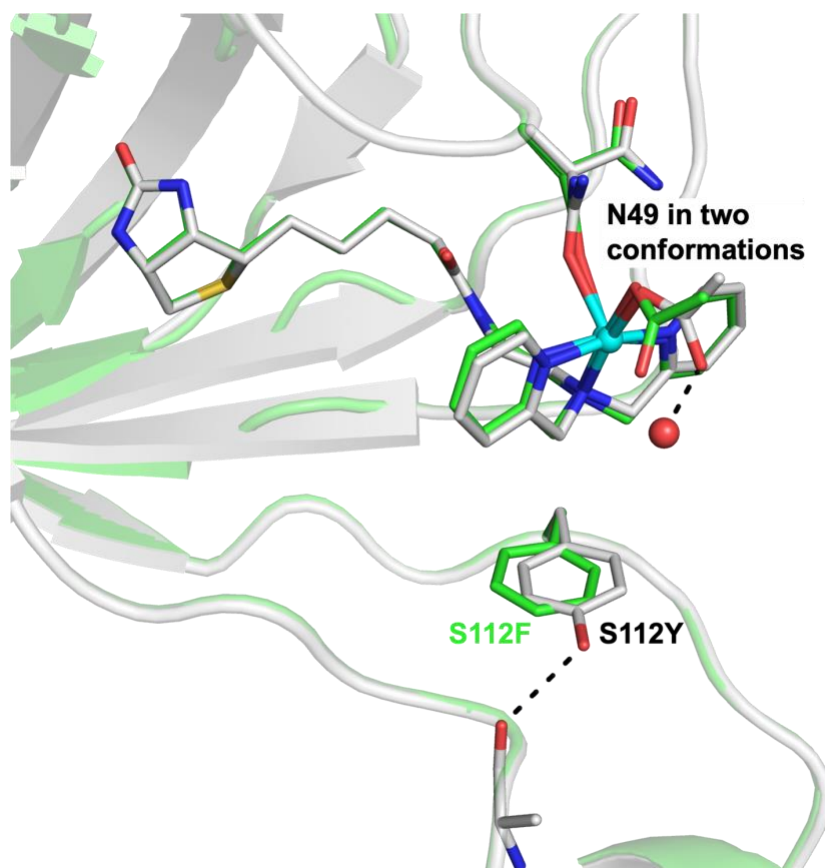

**Figure S25.** Molecular models of **1** (PDB: 9CSU, shown in gray) and **4** (PDB: 9E6Z, shown in green). The protein is displayed in cartoon and the Cu complex as well as residues N49 and S112Y/F are displayed in sticks. Copper is colored in cyan and water molecules in red spheres. Hydrogen bonds are suggested in black dashed lines. The orientation of S112Y and S112F relative to the Cu center are comparable, and both mutations support N49 coordination to the Cu cofactor.

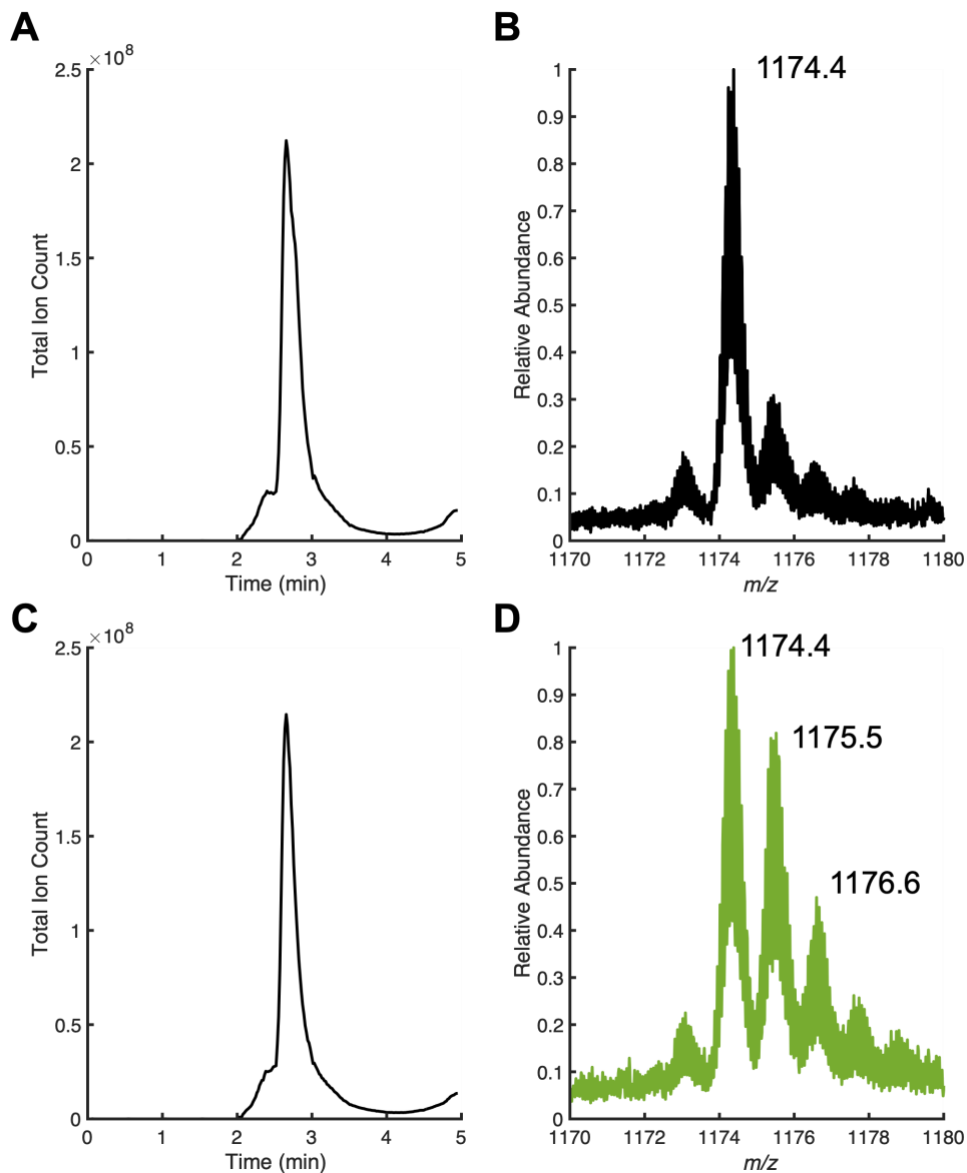

**Figure S26.** (A) Chromatogram of **4**. (B) ESI-Q-TOF positive ion mode mass spectra showing ions of highest abundance from integration of the major peak of the chromatogram in (A). (C) Chromatogram of **4** +  $H_2O_2$ . (D) ESI-Q-TOF positive ion mode mass spectra showing ions of highest abundance from integration of the major peak of the chromatogram in (C).

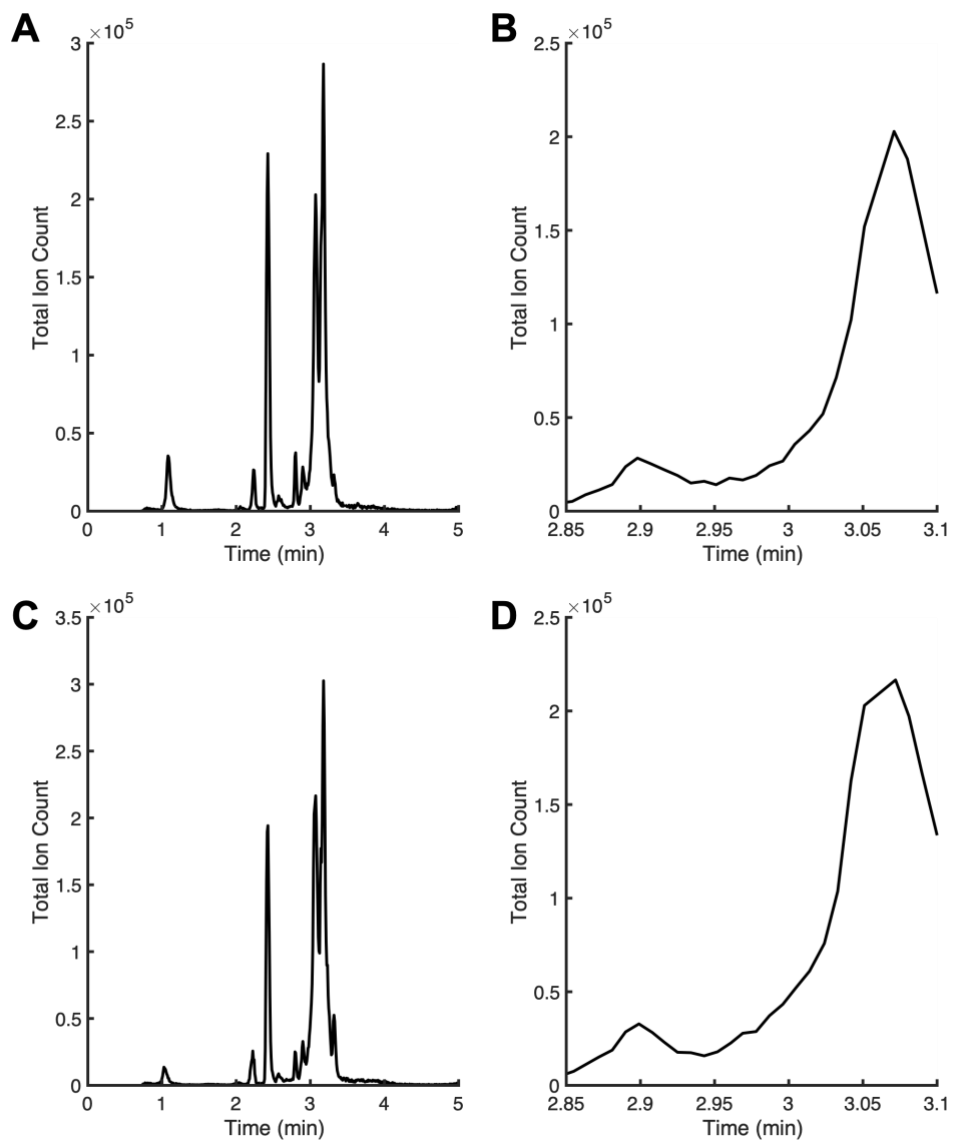

**Figure S27.** (A) Chromatogram of **4** after trypsin digestion. (B) Integrated area of chromatogram to produce Figure 4H. (C) Chromatogram of **4** +  $H_2O_2$  after trypsin digestion. (D) Integrated area of chromatogram to produce Figure 4I.

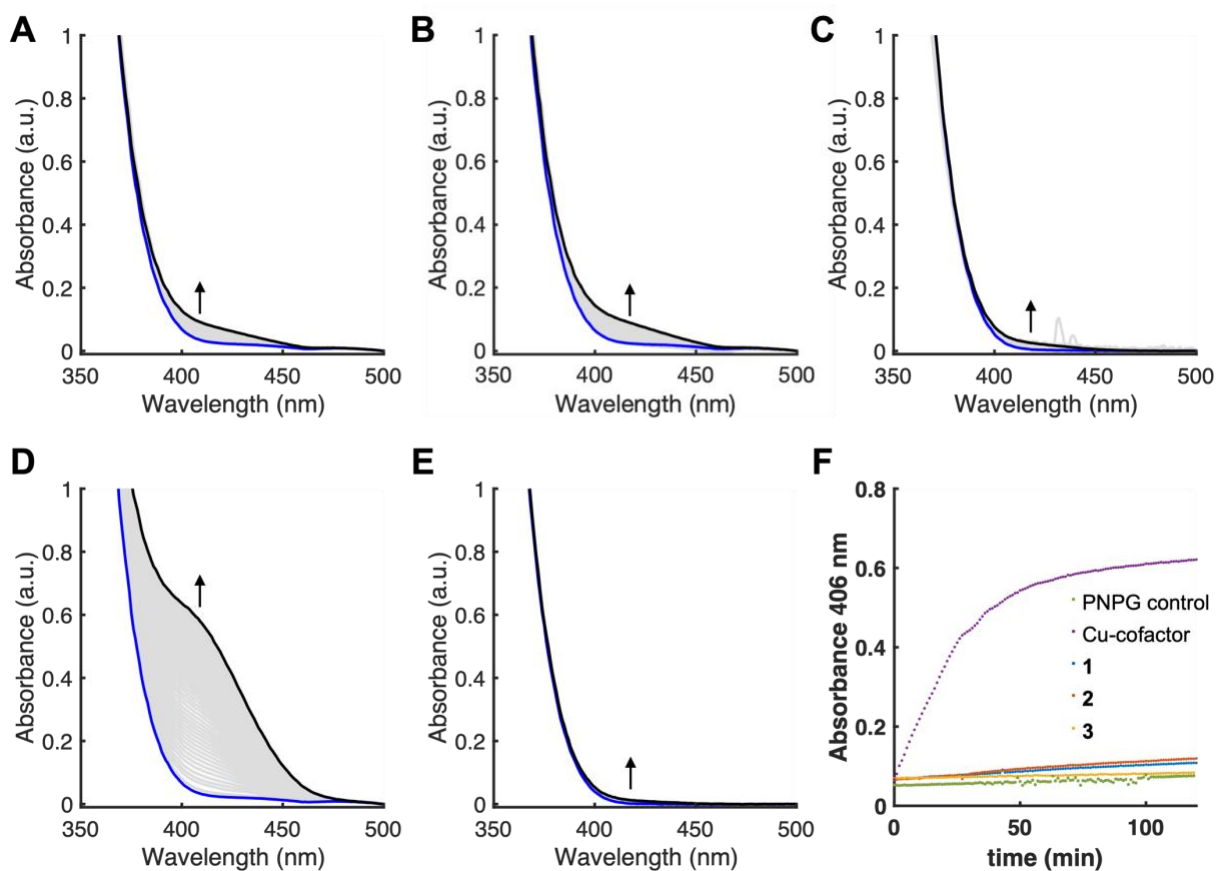

**Figure S28.** Reactivity of (A) **1**, (B) **2**, (C) **3** or (D) Cu cofactor with PNP and H<sub>2</sub>O<sub>2</sub> according to Scheme S2. Spectra of Cu-Sav with 200 equivalents of PNP shown in black and after 120 min reaction with 200 equivalents of H<sub>2</sub>O<sub>2</sub> shown in blue. (E) Reactivity of PNP with H<sub>2</sub>O<sub>2</sub> as a control. UV-vis absorbance at  $\lambda_{\max} = 405$  nm (corresponding to absorbance of 4-nitrophenolate) over 120 min incubation with H<sub>2</sub>O<sub>2</sub>.

**Table S1.** X-band EPR parameters for simulations shown in Figure S3. Due to anisotropic broadening, we cannot confidently assign  $A_2$  or  $A_3$  values.

|                                    | Cu-2xm-S112Y-Sav | Cu-2xm-S112Y-Sav<br>+ 10 H <sub>2</sub> O <sub>2</sub><br>1 hr | Cu-2xm-S112Y-Sav<br>+ 10 H <sub>2</sub> O <sub>2</sub><br>4 hr |
|------------------------------------|------------------|----------------------------------------------------------------|----------------------------------------------------------------|
| $g_1$                              | 2.23             | 2.23                                                           | 2.23                                                           |
| $g_2$                              | 2.08             | 2.07                                                           | 2.07                                                           |
| $g_3$                              | 2.04             | 2.04                                                           | 2.04                                                           |
| $A_1$ (MHz)                        | 500              | 495                                                            | 501                                                            |
| $A_2$                              | 85 <sup>a</sup>  | 101 <sup>a</sup>                                               | 91 <sup>a</sup>                                                |
| $A_3$                              | 65 <sup>a</sup>  | 62 <sup>a</sup>                                                | 57 <sup>a</sup>                                                |
| Anisotropic<br>Broadening<br>(MHz) | $A_1$            | 224                                                            | 220                                                            |
|                                    | $A_2$            | 257                                                            | 303                                                            |
|                                    | $A_3$            | 143                                                            | 145                                                            |

<sup>a</sup> These values are approximations as they are smaller than the anisotropic broadening for their respective splittings.



**Table S2.** X-ray crystallography data processing and refinement statistics

| Sav Variant                                         | [Cu <sup>II</sup> (biot-et-dpa)C2XM-Sav]<br>(2) | [Cu <sup>II</sup> (biot-et-dpa)C2XM-S112Y-Sav]<br>(1) | [Cu <sup>II</sup> (biot-et-dpa)C2XM-S112Y-Sav]<br>+ H <sub>2</sub> O <sub>2</sub><br>(Y112 hydroxylated) | [Cu <sup>II</sup> (biot-et-dpa)C2XM-S112Y-Sav]<br>+ H <sub>2</sub> O <sub>2</sub><br>(2 Y112 rotamers) | [Cu <sup>II</sup> (biot-et-dpa)C2XM-S112A-K121Y-Sav]<br>(3) | [Cu <sup>II</sup> (biot-et-dpa)C2XM-S112F-Sav]<br>(4) |
|-----------------------------------------------------|-------------------------------------------------|-------------------------------------------------------|----------------------------------------------------------------------------------------------------------|--------------------------------------------------------------------------------------------------------|-------------------------------------------------------------|-------------------------------------------------------|
| PDB Code                                            | 9CST                                            | 9CSU                                                  | 9CSV                                                                                                     | Not deposited                                                                                          | 9CSW                                                        | 9E6Z                                                  |
| <b>Data Processing</b>                              |                                                 |                                                       |                                                                                                          |                                                                                                        |                                                             |                                                       |
| Unit Cell (a, b, c, $\alpha$ , $\beta$ , $\gamma$ ) | 57.82 Å, 57.82 Å, 184.14 Å, 90°, 90°, 90°       | 57.54 Å, 57.54 Å, 177.10 Å, 90°, 90°, 90°             | 57.55 Å, 57.55 Å, 177.73 Å, 90°, 90°                                                                     |                                                                                                        | 57.77 Å, 57.77 Å, 184.25 Å, 90°, 90°, 90°                   | 57.54 Å, 57.54 Å, 176.28 Å, 90°, 90°, 90°             |
| Space Group                                         | I4 <sub>1</sub> 22                              | I4 <sub>1</sub> 22                                    | I4 <sub>1</sub> 22                                                                                       |                                                                                                        | I4 <sub>1</sub> 22                                          | I4 <sub>1</sub> 22                                    |
| Resolution (Å)                                      | 42.09 – 1.13                                    | 54.72 – 1.60                                          | 27.38 – 1.60                                                                                             |                                                                                                        | 42.08 – 1.302                                               | 41.11 – 1.7                                           |
| Highest resolution shell (Å)                        | 1.17 – 1.13                                     | 1.66 – 1.60                                           | 1.657 – 1.6                                                                                              |                                                                                                        | 1.349 – 1.302                                               | 1.761 – 1.7                                           |
| R-merge (%)                                         | 0.7592 (3.208)                                  | 0.7085 (4.619)                                        | 0.0964 (1.151)                                                                                           |                                                                                                        | 0.6465 (3.806)                                              | 0.2381 (2.023)                                        |
| No. unique reflections                              | 58555 (5764)                                    | 20131 (1966)                                          | 20125 (1984)                                                                                             |                                                                                                        | 38754 (3812)                                                | 16841 (1647)                                          |
| Multiplicity                                        | 79.7 (79.9)                                     | 36.9 (37.1)                                           | 6.7 (6.9)                                                                                                |                                                                                                        | 47.5 (48.2)                                                 | 14.1 (14.5)                                           |
| Mean I/ $\sigma$ (I)                                | 60.09 (2.15)                                    | 13.47 (0.91)                                          | 9.00 (1.42)                                                                                              |                                                                                                        | 62.91 (1.26)                                                | 8.98 (1.33)                                           |
| Completeness                                        | 99.7 (99.88)                                    | 99.49 (97.31)                                         | 99.12 (99.90)                                                                                            |                                                                                                        | 99.33 (99.08)                                               | 99.92 (100.00)                                        |
| CC(1/2)                                             | 0.946 (0.784)                                   | 0.968 (0.309)                                         | 0.997 (0.561)                                                                                            |                                                                                                        | 0.957 (0.607)                                               | 0.996 (0.524)                                         |
| <b>Structure Refinement</b>                         |                                                 |                                                       |                                                                                                          |                                                                                                        |                                                             |                                                       |
| R-work                                              | 0.1446 (0.2598)                                 | 0.1930 (0.3000)                                       | 0.2061 (0.3570)                                                                                          | 0.2073 (0.3608)                                                                                        | 0.1698 (0.3586)                                             | 0.2005 (0.3052)                                       |
| R-free                                              | 0.1615 (0.2692)                                 | 0.2092 (0.3356)                                       | 0.2238 (0.3660)                                                                                          | 0.2218 (0.3640)                                                                                        | 0.1908 (0.3979)                                             | 0.2198 (0.3149)                                       |
| RMSD bond length (Å)                                | 0.014                                           | 0.004                                                 | 0.007                                                                                                    | 0.008                                                                                                  | 0.008                                                       | 0.014                                                 |
| RMSD bond angle (°)                                 | 1.29                                            | 0.66                                                  | 0.88                                                                                                     | 0.88                                                                                                   | 1.00                                                        | 1.27                                                  |
| Avg B-factor (Å <sup>2</sup> )                      | 20.10                                           | 25.01                                                 | 30.25                                                                                                    | 30.24                                                                                                  | 22.91                                                       | 20.26                                                 |
| Protein                                             | 18.28                                           | 23.64                                                 | 29.25                                                                                                    | 29.25                                                                                                  | 21.75                                                       | 19.50                                                 |
| Cu Complex                                          | 25.91                                           | 28.11                                                 | 31.18                                                                                                    | 33.23                                                                                                  | 26.56                                                       | 22.97                                                 |
| Solvent                                             | 31.85                                           | 39.77                                                 | 39.99                                                                                                    | 39.34                                                                                                  | 32.37                                                       | 28.46                                                 |
| Occupancy                                           |                                                 |                                                       |                                                                                                          |                                                                                                        |                                                             |                                                       |
| Cu                                                  | 0.69, 0.31                                      | 0.65                                                  | 0.74                                                                                                     | 0.74                                                                                                   | 0.63                                                        | 0.78                                                  |
| Acetate                                             | N/A                                             | 0.78                                                  | 0.71                                                                                                     | 0.71                                                                                                   | 0.85                                                        | 0.80                                                  |
| N49                                                 | 1.00                                            | 0.61 (bound),<br>0.39                                 | 0.51 (bound),<br>0.49                                                                                    | 0.51 (bound),<br>0.49                                                                                  | 1.00                                                        | 0.58 (bound),<br>0.42                                 |

**Table S3.** Select bond lengths and angles according to labeling in Figure S5.

|                                      | <b>Cu-2xm-S112Y-Sav<br/>(PDB: 9CSU)</b> | <b>Cu-2xm-S112Y-Sav + H<sub>2</sub>O<sub>2</sub><br/>(PDB: 9CSV)</b> |
|--------------------------------------|-----------------------------------------|----------------------------------------------------------------------|
| <b>Cu-N1</b>                         | 1.9 Å                                   | 1.9 Å                                                                |
| <b>Cu-N2</b>                         | 2.0 Å                                   | 2.1 Å                                                                |
| <b>Cu-N3</b>                         | 2.1 Å                                   | 2.0 Å                                                                |
| <b>Cu-O3</b>                         | 2.5 Å                                   | 2.4 Å                                                                |
| <b>Cu-O4<sub>(ACT or W)</sub></b>    | 2.4 Å                                   | 2.5 Å                                                                |
| <b>Cu-O5</b>                         | 3.2 Å                                   | N/A                                                                  |
| <b>Cu-O6</b>                         | 2.9 Å                                   | N/A                                                                  |
| <b>N1-Cu-N2</b>                      | 83.2°                                   | 84.3°                                                                |
| <b>N2-Cu-N3</b>                      | 82.0°                                   | 78.8°                                                                |
| <b>N3-Cu-O4<sub>(ACT or W)</sub></b> | 99.5°                                   | 101.2°                                                               |
| <b>O4<sub>(ACT or W)</sub>-Cu-O3</b> | 87.6°                                   | 84.3°                                                                |
| <b>N1-Cu-O3</b>                      | 94.2°                                   | 92.9°                                                                |
| <b>N2-Cu-O3</b>                      | 101.7°                                  | 107.9°                                                               |
| <b>N3-Cu-O3</b>                      | 93.1°                                   | 90.5°                                                                |
| <b>O1-O7</b>                         | 3.0 Å                                   | 3.2 Å                                                                |
| <b>O2-O7</b>                         | N/A                                     | 2.8 Å                                                                |
| <b>O5-O6</b>                         | 2.1 Å                                   | N/A                                                                  |

**Table S4.** Intact protein LC-MS gradient method

| <b>Time (mins)</b> | <b>Flow (mL/min)</b> | <b>% A</b> | <b>%B</b> | <b>Curve</b> |
|--------------------|----------------------|------------|-----------|--------------|
| 0                  | 0.2                  | 100        | 0         | 6            |
| 0.5                | 0.2                  | 100        | 0         | 6            |
| 2                  | 0.2                  | 10         | 90        | 6            |
| 2.5                | 0.2                  | 10         | 90        | 6            |
| 4                  | 0.2                  | 100        | 0         | 6            |
| 5                  | 0.2                  | 100        | 0         | 6            |

**Table S5.** Peptide LC-MS gradient method

| <b>Time (mins)</b> | <b>Flow (mL/min)</b> | <b>% A</b> | <b>%B</b> | <b>Curve</b> |
|--------------------|----------------------|------------|-----------|--------------|
| 0                  | 0.3                  | 97         | 3         | 6            |
| 0.5                | 0.3                  | 97         | 3         | 6            |
| 2                  | 0.3                  | 40         | 60        | 6            |
| 2.5                | 0.3                  | 40         | 60        | 6            |
| 3                  | 0.3                  | 10         | 90        | 6            |
| 3.5                | 0.3                  | 10         | 90        | 6            |
| 4                  | 0.3                  | 97         | 3         | 6            |
| 5                  | 0.3                  | 97         | 3         | 6            |

**Table S6.** Possible digest fragments of 2xm-S112Y-Sav. Identified ions [DF31]<sup>3+</sup> and [DF31]<sup>2+</sup> highlighted in yellow.

|    | mass       | m/z<br>+2 charge | m/z<br>+3 charge | m/z<br>+4 charge | m/z<br>+5 charge | position | #MC | peptide sequence                                                                                                                              |
|----|------------|------------------|------------------|------------------|------------------|----------|-----|-----------------------------------------------------------------------------------------------------------------------------------------------|
| 1  | 12686.0661 | 6344.03305       | 4229.6887        | 3172.516525      | 2538.21322       | 12-131   | 5   | DEAGITGTWYNQLGSTFIVT<br>AGADGALTGTYESAVGNAES<br>RYVLTGRYDSAPATDGSFTA<br>LGWTVAWKNNYRNAHSATTW<br>SGQYVGGQAQARINTQWLLTY<br>GTTEANAWASTLVGHDTFTK |
| 2  | 10569.9637 | 5285.98185       | 3524.321233      | 2643.490925      | 2114.99274       | 1-102    | 5   | ASMTGGQQMGRDEAGITGTW<br>YNQLGSTFIVTAGADGALTG<br>YESAVGNAESRYVLTGRYD<br>SAPATDGSFTALGWTVAWKN<br>NYRNAHSATTWSGQYVGGQAQAR                        |
| 3  | 9692.771   | 4847.3855        | 3231.923667      | 2424.19275       | 1939.5542        | 53-143   | 5   | YVLTGRYDSAPATDGSFTAL<br>GWTVAWKNNYRNAHSATTWS<br>GQYVGGQAQARINTQWLLTYG<br>TTEANAWASTLVGHDTFTKVKPSAASIDAAK                                      |
| 4  | 9465.4832  | 4733.7416        | 3156.161067      | 2367.3708        | 1894.09664       | 12-102   | 4   | DEAGITGTWYNQLGSTFIVT<br>AGADGALTGTYESAVGNAES<br>RYVLTGRYDSAPATDGSFTA<br>LGWTVAWKNNYRNAHSATTW SGQYVGGQAQAR                                     |
| 5  | 9131.4799  | 4566.73995       | 3044.826633      | 2283.869975      | 1827.29598       | 59-144   | 5   | YDSAPATDGSFTALGWTVAW<br>KNNYRNAHSATTWSGQYVGG<br>AQARINTQWLLTYGTTTEANA<br>WASTLVGHDTFTKVKPSAAS IDAAKK                                          |
| 6  | 9003.3849  | 4502.69245       | 3002.1283        | 2251.846225      | 1801.67698       | 59-143   | 4   | YDSAPATDGSFTALGWTVAW<br>KNNYRNAHSATTWSGQYVGG<br>AQARINTQWLLTYGTTTEANA<br>WASTLVGHDTFTKVKPSAAS IDAAK                                           |
| 7  | 8627.0603  | 4314.53015       | 2876.686767      | 2157.765075      | 1726.41206       | 1-83     | 4   | ASMTGGQQMGRDEAGITGTW<br>YNQLGSTFIVTAGADGALTG<br>YESAVGNAESRYVLTGRYD<br>SAPATDGSFTALGWTVAWKN NYR                                               |
| 8  | 8554.1364  | 4278.0682        | 2852.3788        | 2139.5341        | 1711.82728       | 53-131   | 4   | YVLTGRYDSAPATDGSFTAL<br>GWTVAWKNNYRNAHSATTWS<br>GQYVGGQAQARINTQWLLTYG<br>TTEANAWASTLVGHDTFTK                                                  |
| 9  | 8374.1476  | 4188.0738        | 2792.382533      | 2094.5369        | 1675.82952       | 80-158   | 5   | NNYRNAHSATTWSGQYVGGQA<br>QARINTQWLLTYGTTTEANAW<br>ASTLVGHDTFTKVKPSAASI<br>DAAKKAGVNNNGNPLDAVQQ                                                |
| 10 | 8079.81    | 4040.905         | 2694.27          | 2020.9525        | 1616.962         | 1-79     | 3   | ASMTGGQQMGRDEAGITGTW<br>YNQLGSTFIVTAGADGALTG<br>YESAVGNAESRYVLTGRYD<br>SAPATDGSFTALGWTVAWK                                                    |
| 11 | 7864.7504  | 3933.3752        | 2622.583467      | 1967.1876        | 1573.95008       | 59-131   | 3   | YDSAPATDGSFTALGWTVAW<br>KNNYRNAHSATTWSGQYVGG<br>AQARINTQWLLTYGTTTEANA WASTLVGHDTFTK                                                           |
| 12 | 7826.8973  | 3914.44865       | 2609.965767      | 1957.724325      | 1566.37946       | 84-158   | 4   | NAHSATTWSGQYVGGQAQARI<br>NTQWLLTYGTTTEANAWASTL<br>VGHDTFTKVKPSAASIDAAK<br>KAGVNNNGNPLDAVQQ                                                    |
| 13 | 7522.5798  | 3762.2899        | 2508.5266        | 1881.64495       | 1505.51596       | 12-83    | 3   | DEAGITGTWYNQLGSTFIVT<br>AGADGALTGTYESAVGNAES<br>RYVLTGRYDSAPATDGSFTA LGWTVAWKNNYR                                                             |
| 14 | 6996.484   | 3499.242         | 2333.161333      | 1750.121         | 1400.2968        | 80-144   | 4   | NNYRNAHSATTWSGQYVGGQA<br>QARINTQWLLTYGTTTEANAW<br>ASTLVGHDTFTKVKPSAASI DAAKK                                                                  |
| 15 | 6975.3295  | 3488.66475       | 2326.109833      | 1744.832375      | 1396.0659        | 12-79    | 2   | DEAGITGTWYNQLGSTFIVT<br>AGADGALTGTYESAVGNAES<br>RYVLTGRYDSAPATDGSFTA LGWTVAWK                                                                 |
| 16 | 6868.389   | 3435.1945        | 2290.463         | 1718.09725       | 1374.6778        | 80-143   | 3   | NNYRNAHSATTWSGQYVGGQA<br>QARINTQWLLTYGTTTEANAW<br>ASTLVGHDTFTKVKPSAASI DAAK                                                                   |

|    |           |            |             |             |            |         |   |                                                                         |
|----|-----------|------------|-------------|-------------|------------|---------|---|-------------------------------------------------------------------------|
| 17 | 6449.2337 | 3225.61685 | 2150.744567 | 1613.308425 | 1290.84674 | 84-144  | 3 | NAHSATTWSGQYVGG AQARI<br>NTQWLLTYGTTEANAWASTL<br>VGHDTFTKVKPSAASIDAAK K |
| 18 | 6321.1387 | 3161.56935 | 2108.046233 | 1581.284675 | 1265.22774 | 84-143  | 2 | NAHSATTWSGQYVGG AQARI<br>NTQWLLTYGTTEANAWASTL<br>VGHDTFTKVKPSAASIDAAK   |
| 19 | 5944.814  | 2973.407   | 1982.604667 | 1487.2035   | 1189.9628  | 1-58    | 2 | ASMTGGQQMGRDEAGITGTW<br>YNQLGSTFIVTAGADGALTG<br>TYESAVGNAESRYVLTGR      |
| 20 | 5883.9939 | 2942.99695 | 1962.3313   | 1471.998475 | 1177.79878 | 103-158 | 3 | INTQWLLTYGTTEANAWAST<br>LVGHDTFTKVKPSAASIDAA<br>KKAGVNNGNPLDAVQQ        |
| 21 | 5729.7544 | 2865.8772  | 1910.918133 | 1433.4386   | 1146.95088 | 80-131  | 2 | NNYRNAHSATTWSGQYVGG A<br>QARINTQWLLTYGTTEANAW ASTLVGHDTFTK              |
| 22 | 5333.5535 | 2667.77675 | 1778.851167 | 1334.388375 | 1067.7107  | 53-102  | 3 | YVLTGRYDSAPATDGS GTAL<br>GWTVAWKNNYRNAHSATTWS GQYVGG AQAR               |
| 23 | 5255.428  | 2628.714   | 1752.809333 | 1314.857    | 1052.0856  | 1-52    | 1 | ASMTGGQQMGRDEAGITGTW<br>YNQLGSTFIVTAGADGALTG TYESAVGNAESR               |
| 24 | 5182.5041 | 2592.25205 | 1728.501367 | 1296.626025 | 1037.50082 | 84-131  | 1 | NAHSATTWSGQYVGG AQARI<br>NTQWLLTYGTTEANAWASTL VGHDTFTK                  |
| 25 | 4840.3336 | 2421.1668  | 1614.444533 | 1211.0834   | 969.06672  | 12-58   | 1 | DEAGITGTWYNQLGSTFIVT<br>AGADGALTGTYESAVGNAES RYVLTGR                    |
| 26 | 4644.1675 | 2323.08375 | 1549.055833 | 1162.041875 | 929.8335   | 59-102  | 2 | YDSAPATDGS GTALGWTVAW<br>KNNYRNAHSATTWSGQYVGG AQAR                      |
| 27 | 4506.3303 | 2254.16515 | 1503.1101   | 1127.582575 | 902.26606  | 103-144 | 2 | INTQWLLTYGTTEANAWAST<br>LVGHDTFTKVKPSAASIDAA KK                         |
| 28 | 4378.2353 | 2190.11765 | 1460.411767 | 1095.558825 | 876.64706  | 103-143 | 1 | INTQWLLTYGTTEANAWAST<br>LVGHDTFTKVKPSAASIDAA K                          |
| 29 | 4150.9475 | 2076.47375 | 1384.649167 | 1038.736875 | 831.1895   | 12-52   | 0 | DEAGITGTWYNQLGSTFIVT<br>AGADGALTGTYESAVGNAES R                          |
| 30 | 3390.6501 | 1696.32505 | 1131.2167   | 848.662525  | 679.13002  | 53-83   | 2 | YVLTGRYDSAPATDGS GTAL GWTVAWKNNYR                                       |
| 31 | 3239.6007 | 1620.80035 | 1080.8669   | 810.900175  | 648.92014  | 103-131 | 0 | INTQWLLTYGTTEANAWAST LVGHDTFTK                                          |
| 32 | 2843.3998 | 1422.6999  | 948.7999333 | 711.84995   | 569.67996  | 53-79   | 1 | YVLTGRYDSAPATDGS GTAL GWTVAWK                                           |
| 33 | 2701.2641 | 1351.63205 | 901.4213667 | 676.316025  | 541.25282  | 59-83   | 1 | YDSAPATDGS GTALGWTVAW KNNYR                                             |
| 34 | 2663.411  | 1332.7055  | 888.8036667 | 666.85275   | 533.6822   | 132-158 | 2 | VKPSAASIDAAKKAGVNNGN PLDAVQQ                                            |
| 35 | 2509.1715 | 1255.58575 | 837.3905    | 628.292875  | 502.8343   | 80-102  | 1 | NNYRNAHSATTWSGQYVGG A QAR                                               |
| 36 | 2154.0138 | 1078.0069  | 719.0046    | 539.50345   | 431.80276  | 59-79   | 0 | YDSAPATDGS GTALGWTVAW K                                                 |
| 37 | 1961.9212 | 981.9606   | 654.9737333 | 491.4803    | 393.38424  | 84-102  | 0 | NAHSATTWSGQYVGG AQAR                                                    |
| 38 | 1524.7765 | 763.38825  | 509.2588333 | 382.194125  | 305.9553   | 144-158 | 1 | KAGVNNGNPLDAVQQ                                                         |
| 39 | 1396.6815 | 699.34075  | 466.5605    | 350.170375  | 280.3363   | 145-158 | 0 | AGVNNGNPLDAVQQ                                                          |
| 40 | 1285.7474 | 643.8737   | 429.5824667 | 322.43685   | 258.14948  | 132-144 | 1 | VKPSAASIDAAKK                                                           |
| 41 | 1157.6524 | 579.8262   | 386.8841333 | 290.4131    | 232.53048  | 132-143 | 0 | VKPSAASIDAAK                                                            |
| 42 | 1123.4983 | 562.74915  | 375.4994333 | 281.874575  | 225.69966  | 1-11    | 0 | ASMTGGQQMGR                                                             |
| 43 | 708.4039  | 355.20195  | 237.1346333 | 178.100975  | 142.68078  | 53-58   | 0 | YVLTGR                                                                  |
| 44 | 566.2681  | 284.13405  | 189.7560333 | 142.567025  | 114.25362  | 80-83   | 0 | NNYR                                                                    |

**Table S7.** Calculated b/y ion fragments of DF31 in 2xm-S112Y-Sav. Identified unmodified fragments highlighted in yellow. Identified oxidized fragments highlighted in blue.

| <b>b<sup>++</sup></b> | <b>b<sup>+</sup></b> | <b>b#</b> | <b>Residue</b> | <b>y#</b> | <b>y<sup>+</sup></b> | <b>y<sup>++</sup></b> |
|-----------------------|----------------------|-----------|----------------|-----------|----------------------|-----------------------|
| --                    | --                   | 1         | I              | 28        | --                   | --                    |
| 114.5708              | 228.1343             | 2         | N              | 27        | 2998.4217            | 1563.7620             |
| 165.0946              | 329.1819             | 3         | T              | 26        | 2884.3788            | 1506.7405             |
| 229.1239              | 457.2405             | 4         | Q              | 25        | 2783.3311            | 1456.2167             |
| 322.1636              | 643.3198             | 5         | W              | 24        | 2655.2726            | 1392.1874             |
| 378.7056              | 756.4039             | 6         | L              | 23        | 2469.1932            | 1299.1477             |
| 435.2476              | 869.4880             | 7         | L              | 22        | 2356.1092            | 1242.6057             |
| 485.7715              | 970.5356             | 8         | T              | 21        | 2243.0251            | 1186.0637             |
| 567.3031              | 1133.5990            | 9         | Y              | 20        | 2141.9774            | 1135.5398             |
| 595.8139              | 1190.6204            | 10        | G              | 19        | 1978.9141            | 1054.0082             |
| 646.3377              | 1291.6681            | 11        | T              | 18        | 1921.8926            | 1025.4974             |
| 696.8615              | 1392.7158            | 12        | T              | 17        | 1820.8450            | 974.9736              |
| 761.3828              | 1521.7584            | 13        | E              | 16        | 1719.7973            | 924.4498              |
| 796.9014              | 1592.7955            | 14        | A              | 15        | 1590.7547            | 859.9285              |
| 853.9229              | 1706.8384            | 15        | N              | 14        | 1519.7176            | 824.4099              |
| 889.4414              | 1777.8755            | 16        | A              | 13        | 1405.6747            | 767.3884              |
| 982.4811              | 1963.9549            | 17        | W              | 12        | 1334.6375            | 731.8699              |
| 1017.9996             | 2034.9920            | 18        | A              | 11        | 1148.5582            | 638.8302              |
| 1061.5156             | 2122.0240            | 19        | S              | 10        | 1077.5211            | 603.3117              |
| 1112.0395             | 2223.0717            | 20        | T              | 9         | 990.4891             | 559.7957              |
| 1168.5815             | 2336.1557            | 21        | L              | 8         | 889.4414             | 509.2718              |
| 1218.1157             | 2435.2242            | 22        | V              | 7         | 776.3573             | 452.7298              |
| 1246.6264             | 2492.2456            | 23        | G              | 6         | 677.2889             | 403.1956              |
| 1315.1559             | 2629.3045            | 24        | H              | 5         | 620.2675             | 374.6849              |
| 1372.6694             | 2744.3315            | 25        | D              | 4         | 483.2086             | 306.1554              |
| 1423.1932             | 2845.3791            | 26        | T              | 3         | 368.1816             | 248.6419              |
| 1496.7274             | 2992.4476            | 27        | F              | 2         | 267.1339             | 198.1180              |
| --                    | --                   | 28        | T              | 1         | 120.0655             | 124.5839              |

## References

- 1 A. B. Pangborn, M. A. Giardello, R. H. Grubbs, R. K. Rosen, F. J. Timmers and M. Beckman, *Oranometallics*, 1996, 15, 1518–1520.
- 2 J. M. Chambers, L. M. Lindqvist, A. Webb, D. C. S. Huang, G. P. Savage and M. A. Rizzacasa, *Org Lett*, 2013, 15, 1406–1409.
- 3 S. A. Leaver, M. Palaniandavar, C. A. Kilner and M. A. Halcrow, *Journal of the Chemical Society. Dalton Transactions*, 2003, 3, 4224–4225.
- 4 K. R. Miller, J. D. Paretsky, A. H. Follmer, T. Heinisch, K. Mitra, S. Gul, I. S. Kim, F. D. Fuller, A. Batyuk, K. D. Sutherlin, A. S. Brewster, A. Bhowmick, N. K. Sauter, J. Kern, J. Yano, M. T. Green, T. R. Ward and A. S. Borovik, *Inorg Chem*, 2020, 59, 6000–6009.
- 5 H. Mallin, M. Hesticová, R. Reuter and T. R. Ward, *Nat Protoc*, 2016, 11, 835–852.
- 6 K. R. Miller, S. Biswas, A. Jasniewski, A. H. Follmer, A. Biswas, T. Albert, S. Sabuncu, E. L. Bominaar, M. P. Hendrich, P. Moënne-Loccoz and A. S. Borovik, *J Am Chem Soc*, 2021, 143, 2384–2393.
- 7 S. I. Mann, T. Heinisch, T. R. Ward and A. S. Borovik, *J Am Chem Soc*, 2017, 139, 17289–17292.
- 8 P. Dixit, B. Basu, M. Puri, D. K. Tuli, A. S. Mathur and C. J. Barrow, *Biotechnol Biofuels*, , DOI:10.1186/s13068-019-1526-4.
- 9 T. G. G. Battye, L. Kontogiannis, O. Johnson, H. R. Powell and A. G. W. Leslie, *Acta Crystallogr D Biol Crystallogr*, 2011, 67, 271–281.
- 10 W. Kabsch, *Acta Crystallogr D Biol Crystallogr*, 2010, 66, 125–132.
- 11 P. R. Evans, *Acta Crystallogr D Biol Crystallogr*, 2011, 67, 282–292.
- 12 P. D. Adams, P. V. Afonine, G. Bunkóczi, V. B. Chen, I. W. Davis, N. Echols, J. J. Headd, L. W. Hung, G. J. Kapral, R. W. Grosse-Kunstleve, A. J. McCoy, N. W. Moriarty, R. Oeffner, R. J. Read, D. C. Richardson, J. S. Richardson, T. C. Terwilliger and P. H. Zwart, *Acta Crystallogr D Biol Crystallogr*, 2010, 66, 213–221.
- 13 G. N. Murshudov Alexe, A. Vagin and E. J. Dodson, *Refinement of Macromolecular Structures by the Maximum-Likelihood Method*, 1997, vol. 53.
- 14 P. Emsley and K. Cowtan, *Acta Crystallogr D Biol Crystallogr*, 2004, 60, 2126–2132.
- 15 C. W. Koo, F. J. Tucci, Y. He and A. C. Rosenzweig, *Recovery of particulate methane monooxygenase structure and activity in a lipid bilayer*, .
- 16 P. J. Hart, A. M. Nersissian, R. G. Herrmann, R. M. Nalbandyan, J. S. Valentine and D. Eisenberg, *Protein Science*, 1996, 5, 2175–2183.
- 17 J. C. Cottrell and B. N. Green, *MaxEnt: An Essential Maximum Entropy Based Tool for Interpreting Multiply-Charged Electrospray Data*, .
